# Supplementary material for: Synthesis of 4,5-diheteroarylphenanthrenes and their dinuclear ruthenium(ii) bis(2,2′:6′,2″-terpyridine) complexes possessing severe helical twists
Source: Royal Society of Chemistry journal article supplement (doi:10.1039/b921667g), 2010-01-01
Supplement: b921667g.pdf [file b921667g.pdf]

# Synthesis of 4,5-Diheteroarylphenanthrenes and Their Dinuclear Ruthenium(II) Bis(2,2':6',2''-terpyridine) Complexes Possessing Severe Helical Twists

*Bo Wen, Jeffrey L. Petersen, and Kung K. Wang*

C. Eugene Bennett Department of Chemistry, West Virginia University

Morgantown, West Virginia 26506-6045

## Supplementary Information

### Table of Contents

| Page |                                                                     |
|------|---------------------------------------------------------------------|
| 3    | General Experimental Methods.                                       |
| 3    | Experimental Procedure for Propargylic Alcohol <b>5</b> .           |
| 4    | Experimental Procedure for Diiodide <b>6</b> .                      |
| 4    | Experimental Procedure for Tetraacetylene <b>8a</b> .               |
| 6    | Experimental Procedure for Tetraacetylene <b>8b</b> .               |
| 6    | Experimental Procedure for Tetraacetylene <b>8c</b> .               |
| 7    | Experimental Procedure for 4,5-Diheteroarylphenanthrene <b>2a</b> . |
| 7    | Experimental Procedure for 4,5-Diheteroarylphenanthrene <b>2b</b> . |
| 8    | Experimental Procedure for 4,5-Diheteroarylphenanthrene <b>2c</b> . |

- 9 Experimental Procedure for  $[\text{Cl}_3\text{Ru}(\mathbf{2c})\text{RuCl}_3]$  (**10**).
- 9 Experimental Procedure for  $[(4'\text{-EtOtpy})\text{Ru}(\mathbf{2c})\text{Ru}(4'\text{-EtOtpy})](\text{PF}_6)_4$  (**13**).
- 10 Experimental Procedure for  $[(4'\text{-Cltpy})\text{Ru}(\mathbf{2c})\text{Ru}(4'\text{-Cltpy})](\text{PF}_6)_4$  (**14**).
- 11–12  $^1\text{H}$  and  $^{13}\text{C}$  NMR Spectra of Propargylic Alcohol **5**.
- 13–14  $^1\text{H}$  and  $^{13}\text{C}$  NMR Spectra of Diiodide **6**.
- 15–16  $^1\text{H}$  and  $^{13}\text{C}$  NMR Spectra of Tetraacetylene *meso*-**8a**.
- 17–18  $^1\text{H}$  and  $^{13}\text{C}$  NMR Spectra of Tetraacetylene *rac*-**8a**.
- 19–20  $^1\text{H}$  and  $^{13}\text{C}$  NMR Spectra of Tetraacetylene **8b**.
- 21–22  $^1\text{H}$  and  $^{13}\text{C}$  NMR Spectra of Tetraacetylene **8c**.
- 23–24  $^1\text{H}$  and  $^{13}\text{C}$  NMR Spectra of 4,5-Diheteroarylphenanthrene **2a**.
- 25–27  $^1\text{H}$  and  $^{13}\text{C}$  NMR Spectra of 4,5-Diheteroarylphenanthrene **2b**.
- 28–30  $^1\text{H}$  and  $^{13}\text{C}$  NMR Spectra of 4,5-Diheteroarylphenanthrene **2c**.
- 31  $^1\text{H}$  NMR Spectrum of  $[\text{Cl}_3\text{Ru}(\mathbf{2c})\text{RuCl}_3]$  (**10**).
- 32–33  $^1\text{H}$  and  $^{13}\text{C}$  NMR Spectra of  $[(4'\text{-EtOtpy})\text{Ru}(\mathbf{2c})\text{Ru}(4'\text{-EtOtpy})](\text{PF}_6)_4$  (**13**).
- 34  $^1\text{H}$  NMR Spectrum of  $[(4'\text{-Cltpy})\text{Ru}(\mathbf{2c})\text{Ru}(4'\text{-Cltpy})](\text{PF}_6)_4$  (**14**).
- 35 Figure S1. ORTEP Drawing of the Crystal Structure of *meso*-**8a**.
- 36 Figure S2. ORTEP Drawing of the Crystal Structure of *rac*-**8a**.
- 37 Figure S3. ORTEP Drawing of the Crystal Structure of **2a**.
- 38 Figure S4. ORTEP Drawing of the Crystal Structure of **2c**.
- 39 Figure S5. UV–vis and Luminescence Spectra of **2a**, **2b**, and **2c**.

**General Experimental Methods.** All reactions were conducted in oven-dried (120 °C) glassware under a nitrogen atmosphere. Diethyl ether and tetrahydrofuran (THF) were distilled from benzophenone ketyl prior to use. Commercially available chemicals were of reagent grade and were used as received without further purification. Diketone **4**,<sup>1c</sup> 1-ethynyl-2-iodobenzene (**3**),<sup>4</sup> 4-ethynylpyridine (**7a**),<sup>6</sup> 5-ethynyl-2,2'-bipyridine (**7b**),<sup>7</sup> 4'-ethynyl-2,2':6',2''-terpyridine (**7c**),<sup>7a,8</sup> 4'-ethoxy-2,2':6',2''-terpyridine (**11**),<sup>8b</sup> and 4'-chloro-2,2':6',2''-terpyridine (**12**)<sup>8a,b</sup> were prepared according to the reported procedures. Purification by column chromatography was performed using 32-63  $\mu\text{m}$  silica gel. Melting points were uncorrected. High resolution mass spectra were obtained on a hybrid linear ion trap Fourier transform mass spectrometer system equipped with an ion source. UV-vis spectra of  $2.5 \times 10^{-5}$  M solutions of **2a-c** in dichloromethane and  $1.0 \times 10^{-5}$  M solutions of **13**, **14**, and  $[\text{Ru}(4'\text{-EtOtpy})_2](\text{PF}_6)_2$  in acetonitrile were recorded at room temperature. Emission spectra of  $1.0 \times 10^{-7}$  M solutions of **2a-c** in dichloromethane were recorded at room temperature upon excitation at 360 nm.

**Propargylic Alcohol 5.** To 6.00 g (26.3 mmol) of 1-ethynyl-2-iodobenzene (**3**) in 50 mL of THF under a nitrogen atmosphere at 0 °C was added 23.3 mL of a 1.2 M solution of LDA (28.0 mmol) in hexanes. After 30 min of stirring, a solution of 3.23 g of diketone **4** (13.1 mmol) in 40 mL of THF was introduced via cannula, and the reaction mixture was allowed to warm to room temperature. After an additional 2 h, 50 mL of water was introduced, and the reaction mixture was extracted with diethyl ether. The combined organic extracts were washed with brine and water, dried over sodium sulfate, and concentrated. The residue was purified by flash column chromatography (silica gel/20% THF in hexanes,  $R_f = 0.33$ ) to produce 8.73 g (12.5 mmol, 95%, 1:1 mixture of the *meso* and *rac* isomers) of **5** as a white solid: mp 227–228 °C; IR 3559, 757  $\text{cm}^{-1}$ ;  $^1\text{H}$  NMR (mixture of the *meso* and *rac* isomers,  $\text{CDCl}_3$ , 600 MHz)  $\delta$  7.85 (2 H, dd,  $J = 7.8$ ,

1.2 Hz), 7.71 (4 H, s), 7.48 (2 H, dd,  $J = 7.8, 1.2$  Hz), 7.30 (2 H, td,  $J = 7.5, 1.2$  Hz), 7.01 (2 H, td,  $J = 8.1, 1.8$  Hz), 2.45 (2 H, br), 1.12 (18 H, s);  $^{13}\text{C}$  NMR (mixture of the *meso* and *rac* isomers,  $\text{CDCl}_3$ , 150 MHz)  $\delta$  141.0, 138.8, 133.2, 129.52, 129.49, 127.7, 126.7, 100.4, 96.1, 87.6, 79.5, 40.0, 25.7; HRMS  $m/z$  calcd for  $\text{C}_{32}\text{H}_{32}\text{I}_2\text{O}_2\text{Na}$  ( $\text{MNa}^+$ ) 725.0384, found 725.0385.

**Diiodide 6.** To a mixture of **5** (8.4 g, 11.96 mmol) and triethylsilane (4.17 g, 35.9 mmol) in 200 mL of dichloromethane was added 1.09 g of trifluoroacetic acid (95.6 mmol). After 1 h of stirring at room temperature, 5.1 g (48.1 mmol) of sodium carbonate was added followed by 50 mL of water. The organic layer was separated, washed with brine and water, dried over sodium sulfate, and evaporated under reduced pressure. The residue was purified by flash column chromatography (silica gel/10% diethyl ether in hexanes,  $R_f = 0.57$ ) to provide 7.69 g (11.5 mmol, 96%, 1:1 mixture of the *meso* and *rac* isomers) of **6** as a white solid: mp 182–183 °C; IR 2219, 1462, 750  $\text{cm}^{-1}$ ;  $^1\text{H}$  NMR (mixture of the *meso* and *rac* isomers,  $\text{CDCl}_3$ , 600 MHz)  $\delta$  7.83 (2 H, dd,  $J = 8.1, 1.2$  Hz), 7.43 (2 H, dd,  $J = 7.8, 1.8$  Hz), 7.38 (4 H, s), 7.26 (2 H, td,  $J = 7.5, 1.2$  Hz), 6.96 (2 H, td,  $J = 7.8, 1.8$  Hz), 3.68 (2 H, s), 1.08 (18 H, s);  $^{13}\text{C}$  NMR (mixture of the *meso* and *rac* isomers,  $\text{CDCl}_3$ , 150 MHz)  $\delta$  138.6, 137.4, 133.0, 130.6, 129.1, 128.8, 127.6, 100.6, 95.7, 85.6, 50.3, 35.7, 27.9; HRMS  $m/z$  calcd for  $\text{C}_{32}\text{H}_{33}\text{I}_2$  ( $\text{MH}^+$ ) 671.0666, found 671.0665.

**Tetraacetylene 8a.** The following procedure for **8a** is representative for the preparation of tetraacetylenes **8a–c**. To a mixture of **6** (0.90 g, 1.34 mmol),  $\text{Pd}(\text{PPh}_3)_2\text{Cl}_2$  (0.047 g, 0.067 mmol), and  $\text{CuI}$  (0.0064 g, 0.034 mmol) in 40 mL of triethylamine under a nitrogen atmosphere was added via cannula a solution of **7a** (0.29 g, 2.81 mmol) in 20 mL of triethylamine. The resulting mixture was heated to reflux for 24 h before it was allowed to cool to room temperature. The mixture was concentrated in vacuo. The black residue was dissolved in 100 mL of dichloromethane and then washed with brine and water. The organic layer was separated,



dried over sodium sulfate, and concentrated. Purification by flash column chromatography (silica gel/CH<sub>2</sub>Cl<sub>2</sub>:MeOH = 19:1,  $R_f$  = 0.45) provided 0.75 g (1.2 mmol, 90%, 1:1 mixture of the *meso* and *rac* isomers) of **8a** as a yellow solid with some fractions contained only the *meso* or the *rac* isomer: mp 183–185 °C; IR 2218, 1590, 1235, 821, 764 cm<sup>-1</sup>; *meso*-**8a**: <sup>1</sup>H NMR (CDCl<sub>3</sub>, 600 MHz)  $\delta$  8.55 (4 H, br s), 7.56 (2 H, dd,  $J$  = 7.8, 1.2 Hz), 7.53 (2 H, dd,  $J$  = 7.8, 1.2 Hz), 7.35 (2 H, td,  $J$  = 7.8, 1.2 Hz), 7.30 (2 H, td,  $J$  = 7.8, 1.2 Hz), 7.297–7.28 (8 H, m), 3.66 (2 H, s), 1.02 (18 H, s); <sup>13</sup>C NMR (CDCl<sub>3</sub>, 150 MHz)  $\delta$  148.0, 137.6, 133.2, 132.5, 132.4, 129.3, 129.0, 127.6, 126.8, 126.1, 124.0, 96.4, 95.1, 89.4, 82.2, 50.2, 35.5, 27.8. *rac*-**8a**: <sup>1</sup>H NMR (CDCl<sub>3</sub>, 600 MHz)  $\delta$  8.50 (4 H, br s), 7.52 (2 H, d,  $J$  = 7.8 Hz), 7.46 (2 H, d,  $J$  = 6.6 Hz), 7.30–7.24 (12 H, m), 3.67 (2 H, s), 1.01 (18 H, s); <sup>13</sup>C NMR (CDCl<sub>3</sub>, 150 MHz)  $\delta$  149.4, 137.5, 132.3, 132.2, 131.6, 128.9, 128.8, 127.4, 126.7, 125.6, 124.3, 96.3, 93.3, 89.7, 82.1, 50.2, 35.5, 27.7; MS  $m/z$  621 (MH<sup>+</sup>), 254; HRMS  $m/z$  calcd for C<sub>46</sub>H<sub>41</sub>N<sub>2</sub> (MH<sup>+</sup>) 621.3264, found 621.3261. Recrystallization of the separated *meso*-**8a** and *rac*-**8a** from CH<sub>2</sub>Cl<sub>2</sub>/MeOH produced crystals suitable for X-ray structure analyses.

Crystal data for *meso*-**8a**: C<sub>46</sub>H<sub>40</sub>N<sub>2</sub>,  $M$  = 620.80, monoclinic, space group  $P2_1/n$ , colorless,  $a$  = 12.4736(7) Å,  $b$  = 5.9821(3) Å,  $c$  = 24.7092(14) Å,  $\beta$  = 100.789(1)°,  $V$  = 1811.17(17) Å<sup>3</sup>,  $Z$  = 2,  $D_c$  = 1.138 g/cm<sup>3</sup>,  $\mu$ (Mo-K $\alpha$ ) = 0.66 cm<sup>-1</sup>,  $T$  = 293 K, 4067 unique data with  $R_{int}$  = 0.0432. Final  $R_1$  = 0.0568,  $wR_2$  = 0.1552 for 2850 reflections with  $I > 2\sigma(I)$ ,  $GOF$  = 1.021. CCDC number 750093.

Crystal data for *rac*-**8a**: C<sub>46</sub>H<sub>40</sub>N<sub>2</sub>,  $M$  = 620.80, monoclinic, space group  $P2_1/c$ , colorless,  $a$  = 13.002(1) Å,  $b$  = 18.459(2) Å,  $c$  = 15.624(1) Å,  $\beta$  = 103.267(2)°,  $V$  = 3649.7(6) Å<sup>3</sup>,  $Z$  = 4,  $D_c$  = 1.130 g/cm<sup>3</sup>,  $\mu$ (Mo-K $\alpha$ ) = 0.65 cm<sup>-1</sup>,  $T$  = 293 K, 8186 unique data with  $R_{int}$  = 0.0509. Final  $R_1$  = 0.0538,  $wR_2$  = 0.1427 for 4978 reflections with  $I > 2\sigma(I)$ ,  $GOF$  = 1.010. CCDC number 750094.

**Tetraacetylene 8b.** The same procedure was repeated as described for **8a** except that 0.27 g (1.5 mmol) of **7b** was treated with a mixture of **6** (0.50 g, 0.75 mmol), Pd(PPh<sub>3</sub>)<sub>2</sub>Cl<sub>2</sub> (0.028 g, 0.040 mmol), and CuI (0.0043 g, 0.023 mmol) in 50 mL of triethylamine. Purification by flash column chromatography (silica gel/CH<sub>2</sub>Cl<sub>2</sub>:MeOH = 19:1, *R<sub>f</sub>* = 0.52) furnished 0.49 g of **8b** (0.65 mmol, 86%, 1:1 mixture of the *meso* and *rac* isomers) as a yellow solid: mp 189–192 °C; IR 2210, 1739, 1217, 752 cm<sup>-1</sup>; <sup>1</sup>H NMR (mixture of the *meso* and *rac* isomers, CDCl<sub>3</sub>, 600 MHz) δ 8.76–8.66 (4 H, m), 8.50–8.43 (4 H, m), 7.89 (1 H, t, *J* = 7.2 Hz), 7.83 (1 H, t, *J* = 7.2 Hz), 7.81–7.77 (2 H, m), 7.54–7.51 (3 H, m), 7.48–7.46 (1 H, m), 7.39–7.34 (2 H, m), 7.32 and 7.31 (4 H, two singlets), 7.28–7.24 (4 H, m), 3.71 and 3.66 (2 H, two singlets), 1.01 (18 H, s); <sup>13</sup>C NMR (mixture of the *meso* and *rac* isomers, CDCl<sub>3</sub>, 150 MHz) δ 154.3, 152.9, 151.7, 151.6, 147.9, 139.74, 139.72, 138.3, 137.54, 137.46, 132.29, 132.23, 132.19, 132.15, 128.99, 128.97, 128.53, 128.47, 127.4, 126.64, 126.59, 124.71, 124.67, 124.2, 122.1, 121.0, 96.29, 96.27, 93.38, 93.33, 89.3, 82.3, 82.1, 50.2, 35.51, 35.50, 27.8; MS *m/z* 775 (MH<sup>+</sup>), 718; HRMS *m/z* calcd for C<sub>56</sub>H<sub>47</sub>N<sub>4</sub> (MH<sup>+</sup>) 775.3795, found 775.3789.

**Tetraacetylene 8c.** The same procedure was repeated as described for **8a** except that 0.26 g (1.0 mmol) of **7c** was treated with a mixture of **6** (0.32 g, 0.48 mmol), Pd(PPh<sub>3</sub>)<sub>2</sub>Cl<sub>2</sub> (0.015 g, 0.021 mmol), and CuI (0.005 g, 0.026 mmol) in 50 mL of triethylamine. Purification by flash column chromatography (silica gel/CH<sub>2</sub>Cl<sub>2</sub>:MeOH = 9:1, *R<sub>f</sub>* = 0.43) furnished 0.34 g of **8c** (0.37 mmol, 77%, 1:1 mixture of the *meso* and *rac* isomers) as a yellow solid: mp 251–253 °C; IR 2220, 1738, 1583, 1390, 788 cm<sup>-1</sup>; <sup>1</sup>H NMR (mixture of the *meso* and *rac* isomers, CDCl<sub>3</sub>, 600 MHz) δ 8.72 (4 H, d, *J* = 3.6 Hz), 8.60 (4 H, d, *J* = 8.4 Hz), 8.59 (4 H, s), 7.86 (4 H, t, *J* = 7.8 Hz), 7.54 (2 H, m), 7.43 (2 H, m), 7.34 (4 H, t, *J* = 6.3 Hz), 7.32 (4 H, s), 7.27–7.22 (4 H, m), 3.64 (2 H, s), 1.01 (18 H, s); <sup>13</sup>C NMR (mixture of the *meso* and *rac* isomers, CDCl<sub>3</sub>, 150 MHz) δ 155.3,

155.2, 148.9, 137.3, 137.2, 133.4, 132.4, 132.2, 129.0, 128.6, 127.3, 126.8, 124.7, 124.0, 123.2, 121.4, 96.5, 93.2, 90.6, 82.1, 50.2, 35.5, 27.7; MS  $m/z$  929 ( $MH^+$ ), 872, 815; HRMS  $m/z$  calcd for  $C_{66}H_{53}N_6$  ( $MH^+$ ) 929.4326, found 929.4319.

**4,5-Diheteroarylphenanthrene 2a.** To 0.28 g (0.45 mmol) of **8a** in 30 mL of anhydrous toluene under a nitrogen atmosphere was added 1.0 mL of a 1.0 M solution of potassium *tert*-butoxide (1.0 mmol) in 2-methyl-2-propanol. The reaction mixture was then heated under reflux for 6 h. After the reaction mixture was allowed to cool to room temperature, 10 mL of water and 120 mL of dichloromethane were introduced, and the organic layer was separated, dried over sodium sulfate, and concentrated. Flash column chromatograph (silica gel/ $CH_2Cl_2$ :MeOH =19:1,  $R_f$  = 0.33) provided 0.16 g (0.26 mmol, 58%) of **2a** as a yellow solid: mp >350 °C; IR 1594, 830, 741  $cm^{-1}$ ;  $^1H$  NMR ( $CDCl_3$ , 600 MHz)  $\delta$  8.33 (4 H, d,  $J$  = 5.4 Hz), 7.89 (2 H, s), 7.45 (2 H, d,  $J$  = 7.8 Hz), 7.13 (2 H, t,  $J$  = 7.5 Hz), 6.80 (2 H, t,  $J$  = 7.5 Hz), 6.63 (4 H, d,  $J$  = 6.0 Hz), 6.30 (2 H, d,  $J$  = 8.4 Hz), 4.45 (2 H, d,  $J$  = 21.0 Hz), 4.19 (2 H, d,  $J$  = 21.0 Hz), 1.83 (18 H, s);  $^{13}C$  NMR ( $CDCl_3$ , 150 MHz)  $\delta$  149.2, 147.3, 144.4, 141.4, 140.2, 139.8, 136.8, 132.1, 131.8, 130.2, 127.4 (br), 127.0, 125.7, 124.1, 122.6, 122.3, 39.7, 38.0, 33.3; HRMS  $m/z$  calcd for  $C_{46}H_{41}N_2$  ( $MH^+$ ) 621.3264, found 621.3263. Recrystallization of **2a** from  $CH_2Cl_2$ /MeOH produced a crystal suitable for X-ray structure analysis.

**4,5-Diheteroarylphenanthrene 2b.** To 0.26 g (0.33 mmol) of **8b** in 30 mL of anhydrous toluene under a nitrogen atmosphere was added 0.7 mL of a 1.0 M solution of potassium *tert*-butoxide (0.7 mmol) in 2-methyl-2-propanol. The reaction mixture was then heated under reflux for 6 h. After the reaction mixture was allowed to cool to room temperature, 10 mL of water and 120 mL of dichloromethane were introduced, and the organic layer was separated, dried over sodium sulfate, and concentrated. Flash column chromatograph (silica gel/ $CH_2Cl_2$ :MeOH =19:1,  $R_f$  =

0.4) provided 0.14 g (0.17 mmol, 53%) of **2b** as a yellow solid: mp >350 °C; IR 1707, 1458, 746 cm<sup>-1</sup>; <sup>1</sup>H NMR (CDCl<sub>3</sub>, 600 MHz) δ 8.70 (2 H, d, *J* = 3.6 Hz), 8.47 (2 H, br s), 8.20 (2 H, br s), 7.93 (2 H, s), 7.89 (4 H, br s), 7.40 (2 H, d, *J* = 7.2 Hz), 7.35 (2 H, t, *J* = 5.4 Hz), 7.06–7.02 (4 H, m), 6.72 (2 H, t, *J* = 7.8 Hz), 6.29 (2 H, d, *J* = 7.8 Hz), 4.43 (2 H, d, *J* = 21.0 Hz), 4.19 (2 H, d, *J* = 21.0 Hz), 1.85 (18 H, s); <sup>13</sup>C NMR (CDCl<sub>3</sub>, 150 MHz) δ 155.6, 148.6, 144.4, 141.1, 140.2, 137.8, 137.5, 135.7, 132.2, 131.0, 130.3, 126.7, 125.9, 124.1, 123.8, 122.5, 122.4, 122.0, 121.2, 39.9, 38.0, 33.4; MS *m/z* 775 (MH<sup>+</sup>), 760; HRMS *m/z* calcd for C<sub>56</sub>H<sub>47</sub>N<sub>4</sub> (MH<sup>+</sup>) 775.3795, found 775.3788.

**4,5-Diheteroarylphenanthrene 2c.** To 0.32 g (0.34 mmol) of **8c** in 30 mL of anhydrous toluene under a nitrogen atmosphere was added 0.7 mL of a 1.0 M solution of potassium *tert*-butoxide (0.7 mmol) in 2-methyl-2-propanol. The reaction mixture was then heated under reflux for 6 h. After the reaction mixture was allowed to cool to room temperature, 10 mL of water and 120 mL of dichloromethane were introduced, and the organic layer was separated, dried over sodium sulfate, and concentrated. Flash column chromatograph (silica gel/CH<sub>2</sub>Cl<sub>2</sub>:MeOH = 9:1, *R<sub>f</sub>* = 0.32) provided 0.15 g (0.16 mmol, 48%) of **2c** as a yellow solid: mp >350 °C; IR 1583, 1565, 1466, 793, 735 cm<sup>-1</sup>; <sup>1</sup>H NMR (CDCl<sub>3</sub>, 60 °C, 600 MHz) δ 8.44 (4 H, br), 8.40 (4 H, br), 7.91 (4 H, br), 7.90 (2 H, s), 7.68 (4 H, br), 7.32 (2 H, d, *J* = 7.2 Hz), 7.10 (4 H, br), 6.97 (2 H, t, *J* = 7.2 Hz), 6.70 (2 H, d, *J* = 7.8 Hz), 6.59 (2 H, t, *J* = 7.5 Hz), 4.18 (2 H, d, *J* = 21.0 Hz), 4.13 (2 H, d, *J* = 21.0 Hz), 1.88 (18 H, s); <sup>13</sup>C NMR (CDCl<sub>3</sub>, 150 MHz) δ 155 (very br), 148.4 (br), 148.2 (br), 144.4, 141.0 (br), 140.0, 137 (very br), 136.5, 132.5 (very br), 132.0, 126.6, 126.0 (br), 125.8, 123.9, 123.3 (br), 122.3, 122.2, 121.1 (br), 39.6, 38.1, 33.3; HRMS *m/z* calcd for C<sub>66</sub>H<sub>53</sub>N<sub>6</sub> (MH<sup>+</sup>) 929.4325, found 929.4319. Recrystallization of **2c** from CH<sub>2</sub>Cl<sub>2</sub>/MeOH produced a

crystal suitable for X-ray structure analysis. The crystal lattice was also found to contain two molecules of CH<sub>2</sub>Cl<sub>2</sub>.

**[Cl<sub>3</sub>Ru(2c)RuCl<sub>3</sub>] (10)**. To a suspension of 0.066 g of RuCl<sub>3</sub>·3H<sub>2</sub>O (0.25 mmol) and 15 mL of ethanol was added 0.110 g of **2c** (0.118 mmol). The reaction mixture was heated to reflux for 16 h before it was allowed to cool to room temperature. The dark brown precipitate was collected by filtration, washed thoroughly with methanol, water, and diethyl ether, and dried in vacuo to yield 0.146 g of **10** (92%) as a dark brown solid: mp >350 °C; IR 1599, 1469, 790, 752 cm<sup>-1</sup>; <sup>1</sup>H NMR (CDCl<sub>3</sub>, 600 MHz) δ 14.40 (2 H, s), 14.28 (2 H, s), 13.82 (2 H, s), 10.17 (2 H, s), 7.75 (2 H, d, *J* = 21.0 Hz), 7.26 (2 H, s), 4.83 (2 H, d, *J* = 21.0 Hz), 4.51 (2 H, s), 1.24 (2 H, s), 0.59 (18 H, s), -1.53 (2 H, s), -2.75 (2 H, s), -3.64 (2 H, s), -7.02 (2 H, s), -9.35 (2 H, s), -9.80 (2 H, s), -32.35 (2 H, s), -35.56 (2 H, s); HRMS *m/z* calcd for C<sub>66</sub>H<sub>52</sub>Cl<sub>6</sub>N<sub>6</sub>Ru<sub>2</sub> (M<sup>+</sup>) 1342.0471, found 1342.0531.

**[(4'-EtOtpy)Ru(2c)Ru(4'-EtOtpy)](PF<sub>6</sub>)<sub>4</sub> (13)**. A mixture of **10** (0.084 g, 0.062 mmol), 4'-EtOtpy (0.035 g, 0.126 mmol), and *N*-ethylmorpholine (0.043 g, 0.37 mmol) in 7 mL of methanol was heated under reflux for 1 h before it was allowed to cool to room temperature. The mixture was filtered and the filtrate was treated with an excess of NH<sub>4</sub>PF<sub>6</sub> (0.10 g, 0.62 mmol) in 10 mL of methanol to give a brown precipitate. The brown precipitate was collected by filtration, washed with water, methanol, and diethyl ether, and dried in vacuo to produce 0.102 g (0.045 mmol, 73%) of **13** as a brown solid. The <sup>1</sup>H NMR spectrum of the brown solid showed the presence of a small amount of the homoleptic species [Ru(4'-EtOtpy)<sub>2</sub>](PF<sub>6</sub>)<sub>2</sub>. The brown solid was further purified by flash column chromatography (silica gel/acetonitrile:saturated aqueous potassium nitrate:water = 7:1:0.5, *R<sub>f</sub>* = 0.48). The main brown band was collected followed by the addition of excess NH<sub>4</sub>PF<sub>6</sub>. The solution was further concentrated in *vacuo* to induce



precipitation. The precipitate was collected and washed with a small amount of methanol, dried in *vacuo*, to produce a more homogeneous sample of **13** as a light brown solid: mp >350 °C; IR 1615, 1213, 826, 787 cm<sup>-1</sup>; <sup>1</sup>H NMR (CD<sub>3</sub>CN, 600 MHz) δ 8.48 (4 H, br s), 8.33 (2 H, s), 8.31 (4 H, s), 7.82 (4 H, br s), 7.64 (2 H, d, *J*=7.2 Hz), 7.39 (2 H, td, *J*= 7.2, 1.2 Hz), 7.33 (2 H, d, *J*= 8.4 Hz), 7.15 (4 H, br s), 7.02 (2 H, t, *J*= 7.8 Hz), 4.61 (4 H, q, *J*= 7.2 Hz), 4.46 (2 H, d, *J*= 21.6 Hz), 4.30 (2 H, d, *J*= 21.6 Hz), 1.97 (18 H, s) 1.64 (6 H, t, *J*= 7.2 Hz); <sup>13</sup>C NMR (CD<sub>3</sub>CN, 150 MHz) δ 167.7, 156.6, 153.9, 147.2, 145.9, 144.3, 142.8, 139.3, 138.9, 137.5, 134.3, 133.8, 131.3, 129.4, 128.9, 127.9, 126.6, 124.6, 122.6, 112.3, 67.2, 40.4, 39.3, 33.9, 14.8; HRMS *m/z* calcd for C<sub>100</sub>H<sub>82</sub>F<sub>24</sub>N<sub>12</sub>O<sub>2</sub>P<sub>4</sub>Ru<sub>2</sub> (M<sup>+</sup>) 2266.3338, found 2266.3423.

**[(4'-Cltpy)Ru(2c)Ru(4'-Cltpy)](PF<sub>6</sub>)<sub>4</sub> (**14**).** A mixture of **10** (0.025 g, 0.019 mmol), 4'-Cltpy (**12**) (0.010 g, 0.038 mmol), and *N*-ethylmorpholine (0.014 g, 0.12 mmol) in 5 mL of methanol was heated under reflux for 1 h before it was allowed to cool to room temperature. The mixture was filtered and the filtrate was treated with an excess of NH<sub>4</sub>PF<sub>6</sub> (0.033 g, 0.20 mmol) in 10 mL of methanol to give a brown precipitate. The brown precipitate was collected by filtration, washed with water, methanol, and diethyl ether, and dried in *vacuo* to produce 0.028 g (0.013 mmol, 68%) of **14** as a brown solid: <sup>1</sup>H NMR (CD<sub>3</sub>CN, 600 MHz) δ 8.87 (4 H, s), 8.50 (4 H, m), 8.34 (2 H, s), 7.9–7.85 (4 H, br), 7.65 (2 H, d, *J*= 7.8 Hz), 7.40 (2 H, t, *J*= 6.6 Hz), 7.36 (2 H, d, *J*= 8.4 Hz), 7.19 (4 H, t, *J*= 6.0 Hz), 7.04 (2 H, t, *J*= 7.2 Hz), 4.46 (2 H, d, *J*= 21.6 Hz), 4.30 (2 H, d, *J*= 21.6 Hz), 1.96 (18 H, s); HRMS *m/z* calcd for C<sub>96</sub>H<sub>72</sub>Cl<sub>2</sub>N<sub>12</sub>Ru<sub>2</sub> (M - 4 PF<sub>6</sub>)<sup>+</sup> 1666.3467, found 1666.3552. The <sup>1</sup>H NMR spectrum showed that the sample contains minor amount of the homoleptic species [Ru(4'-Cltpy)<sub>2</sub>](PF<sub>6</sub>)<sub>2</sub>.

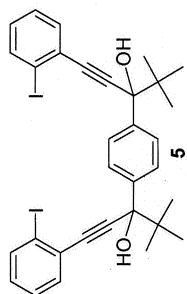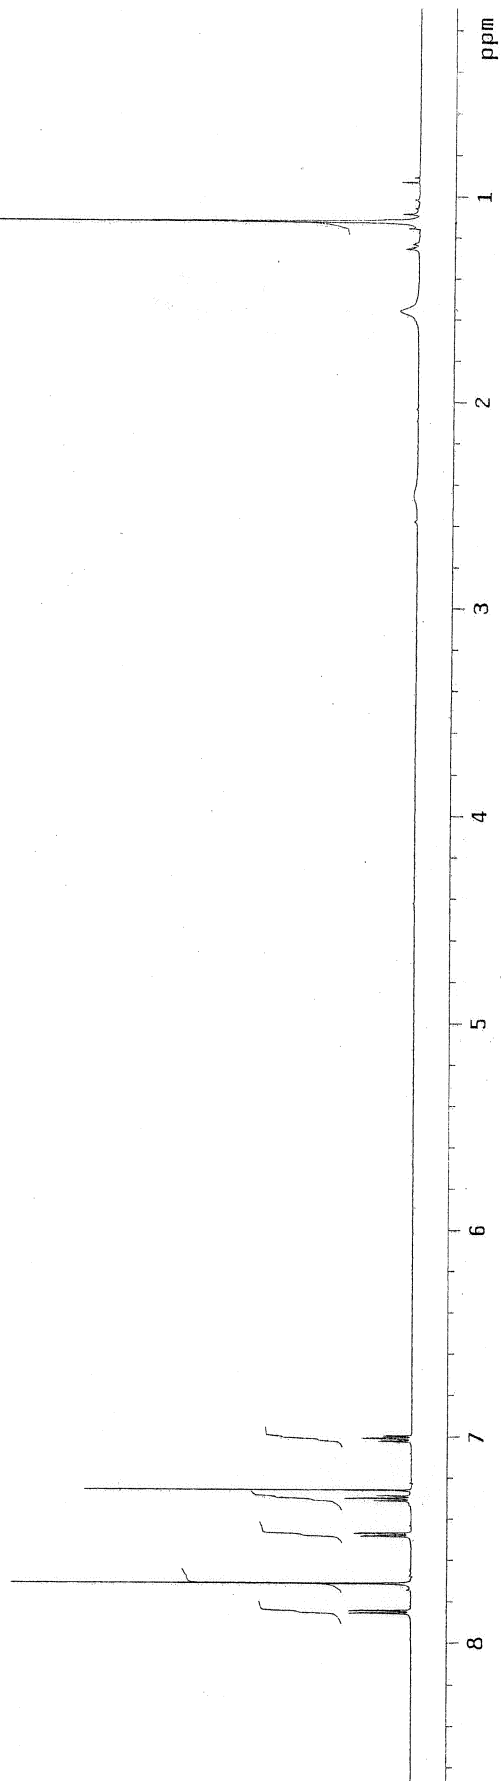



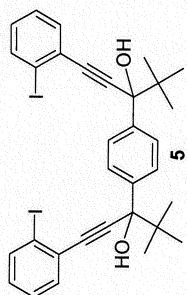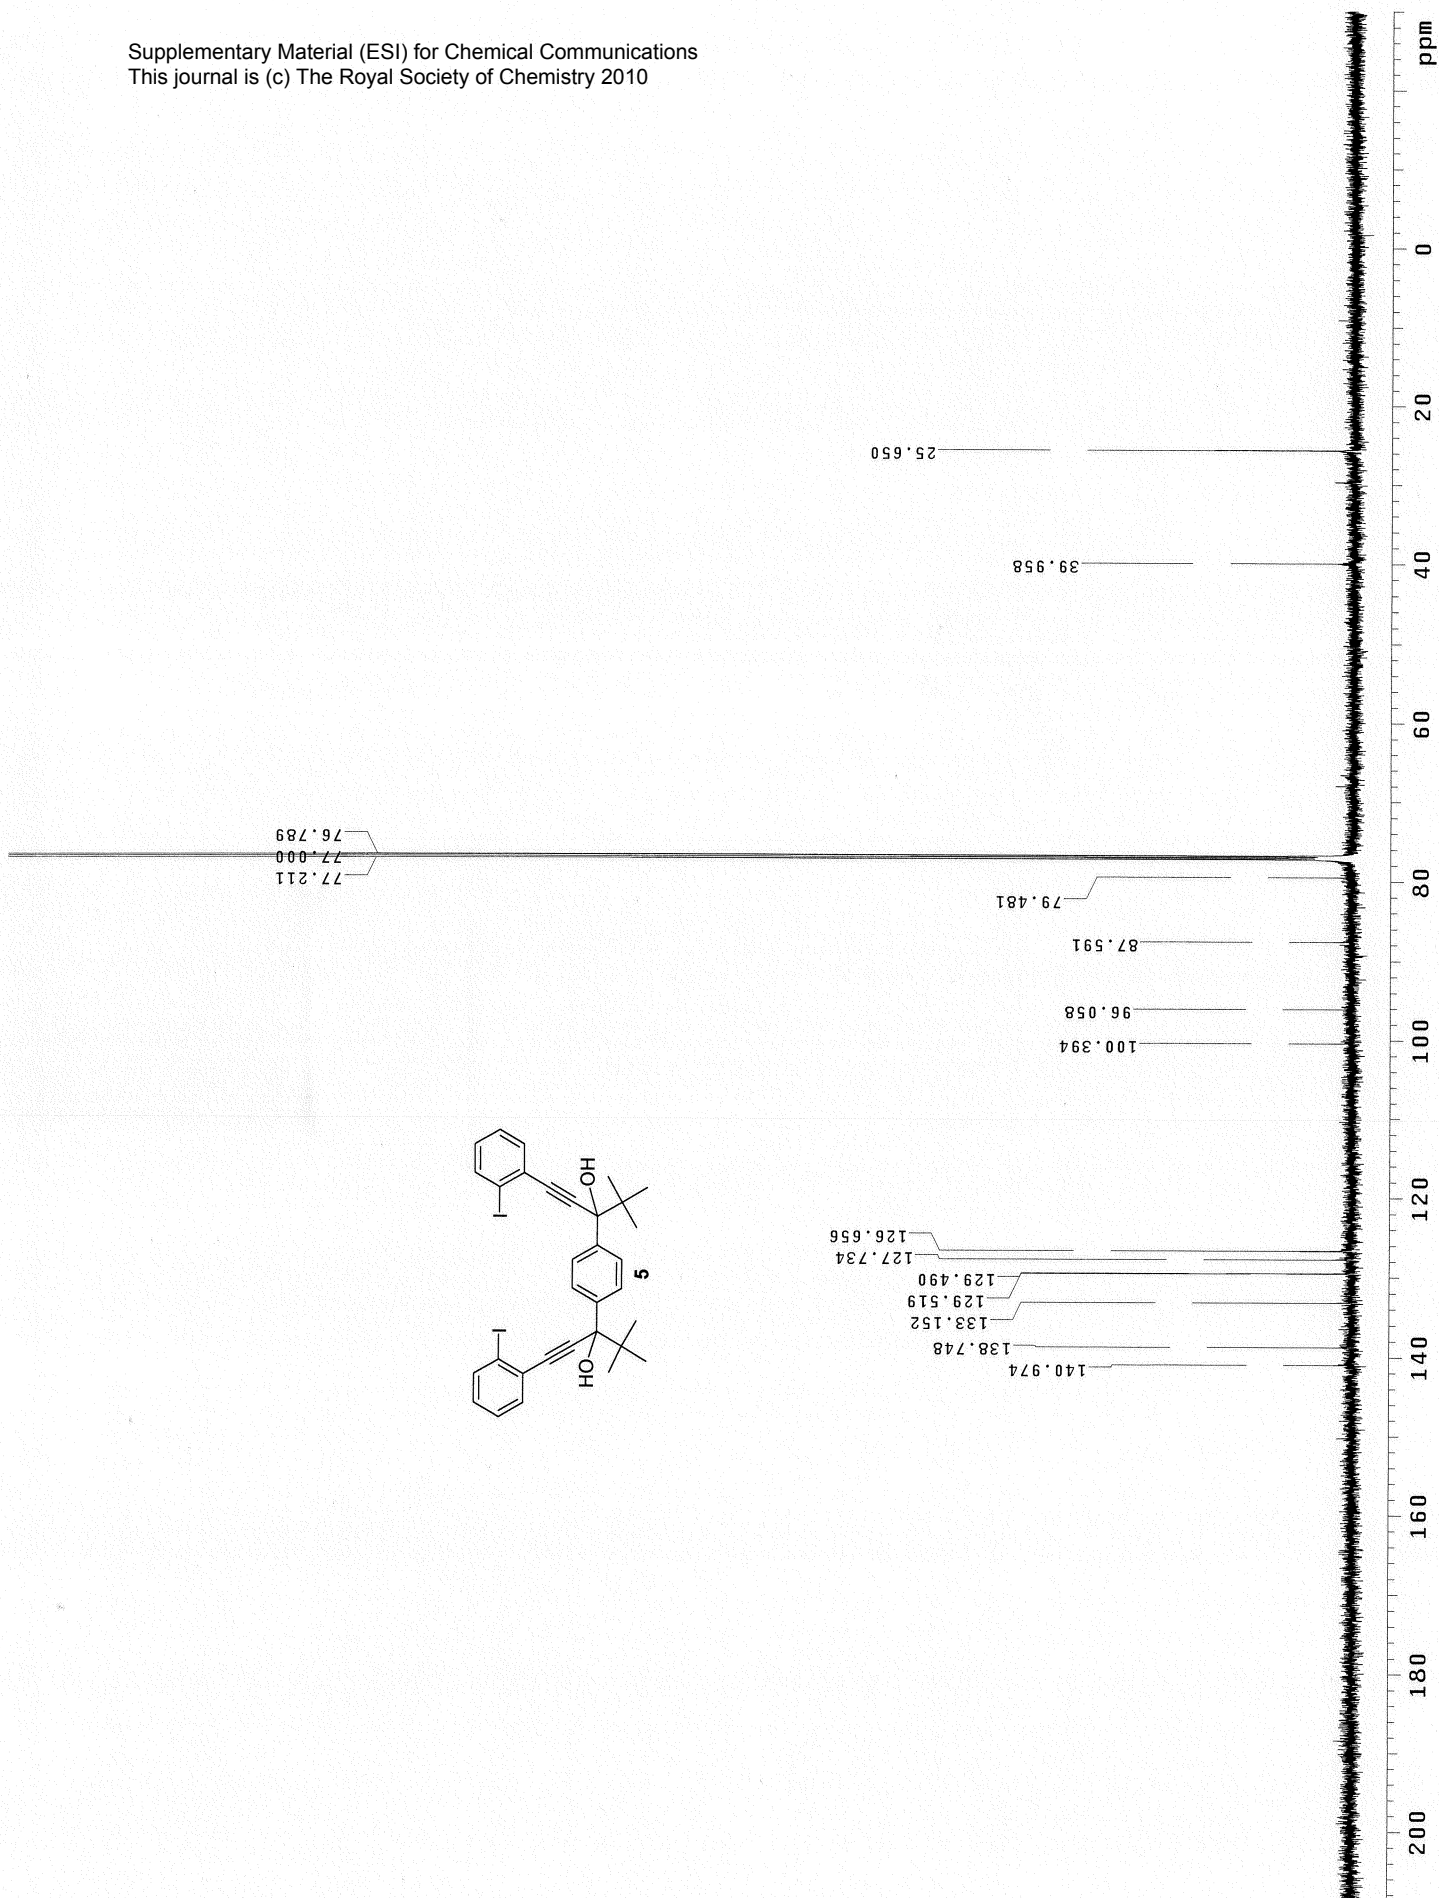

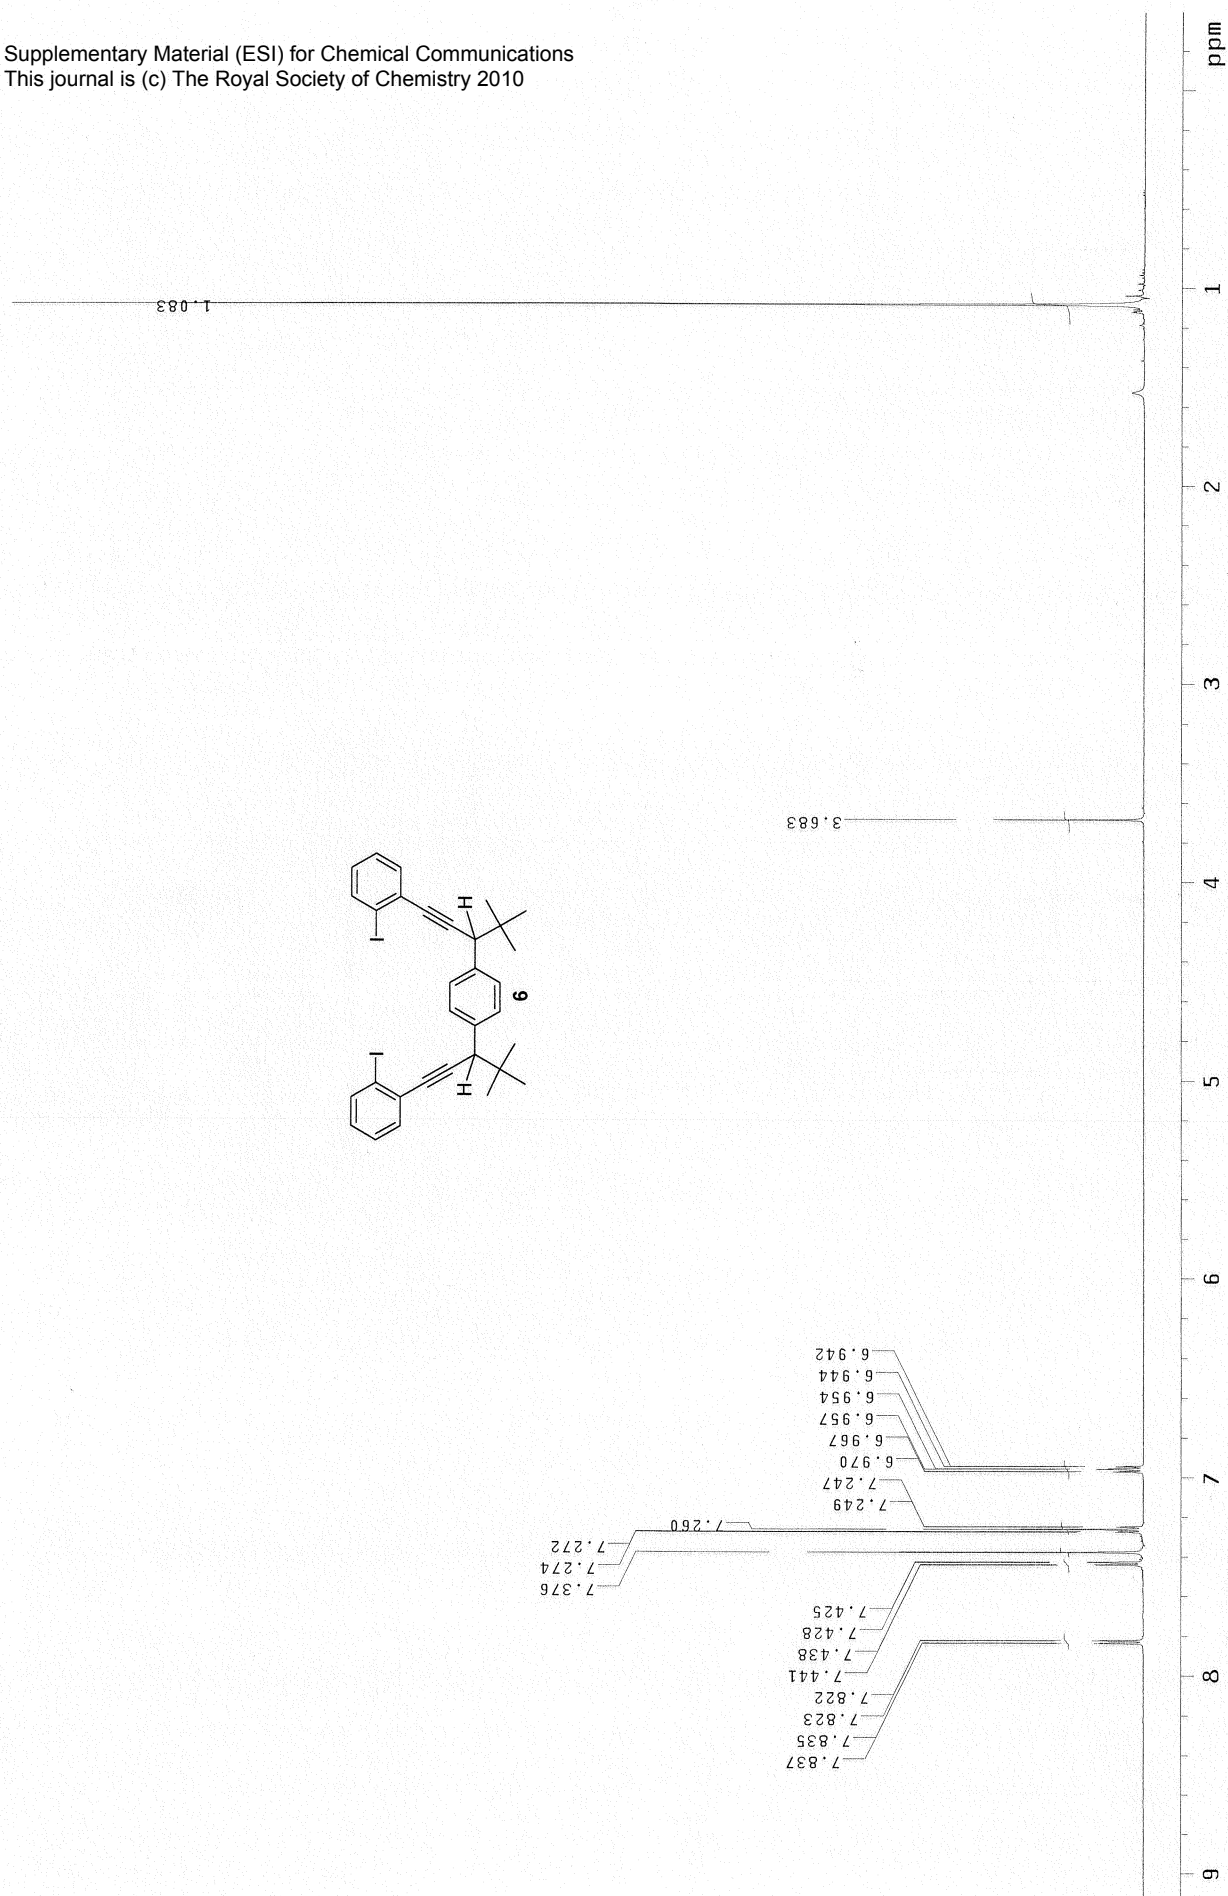

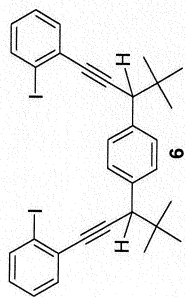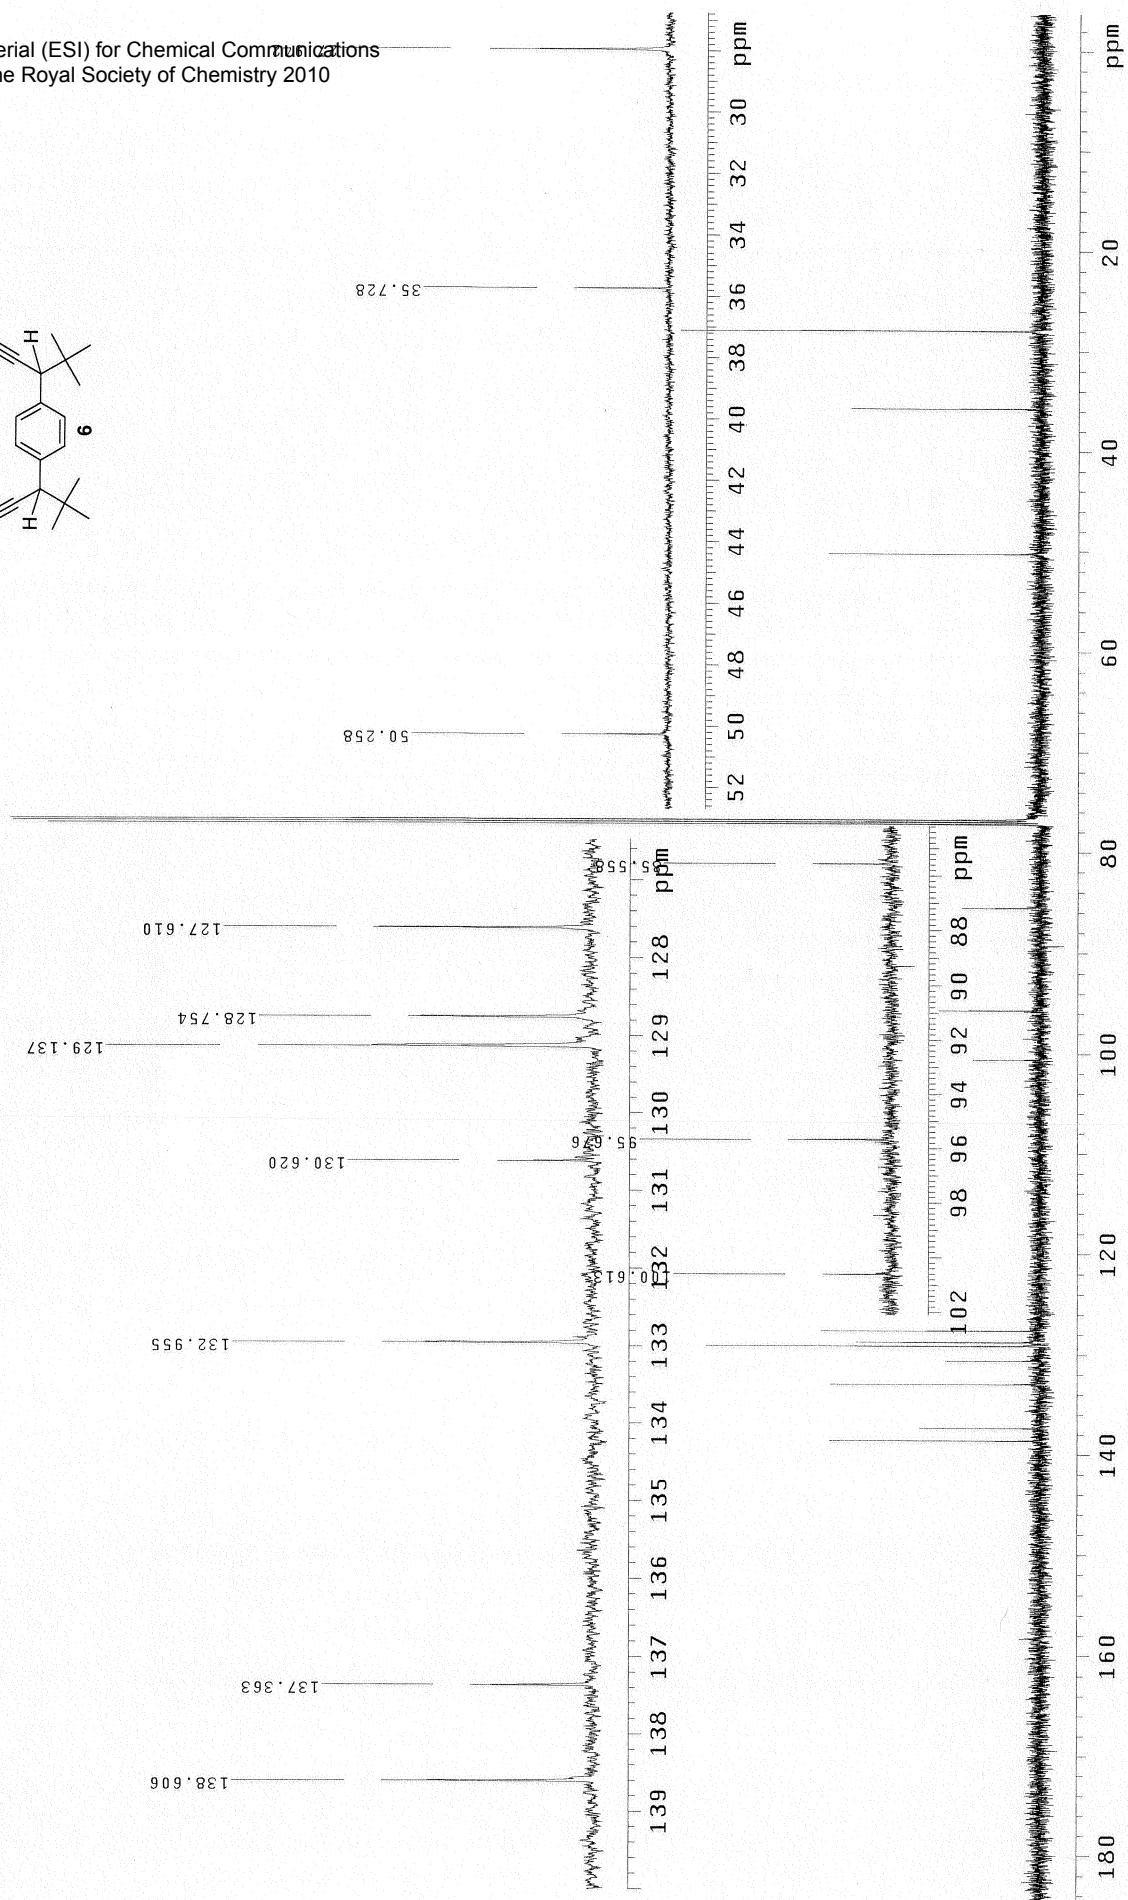

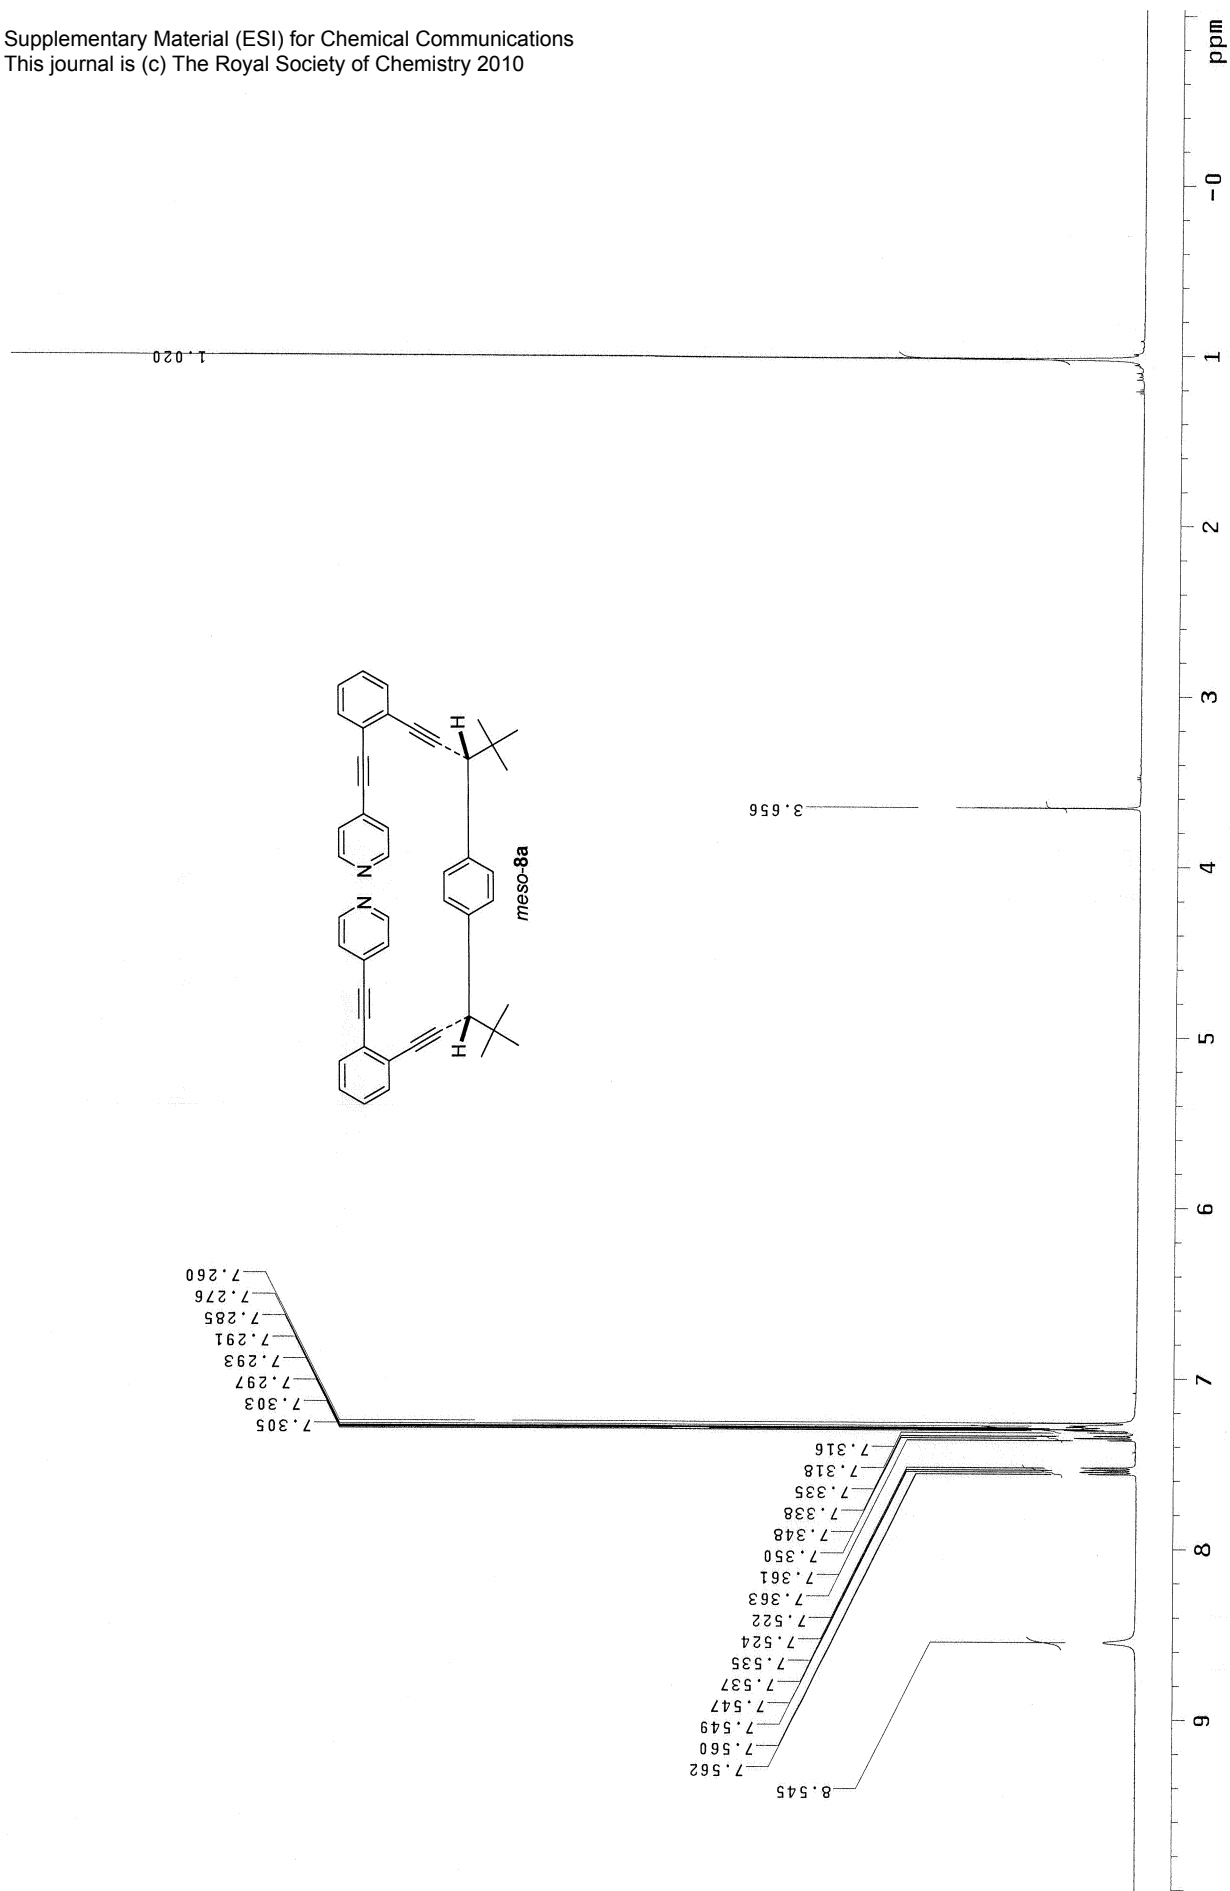

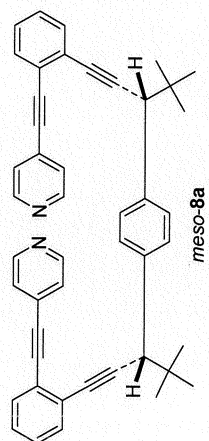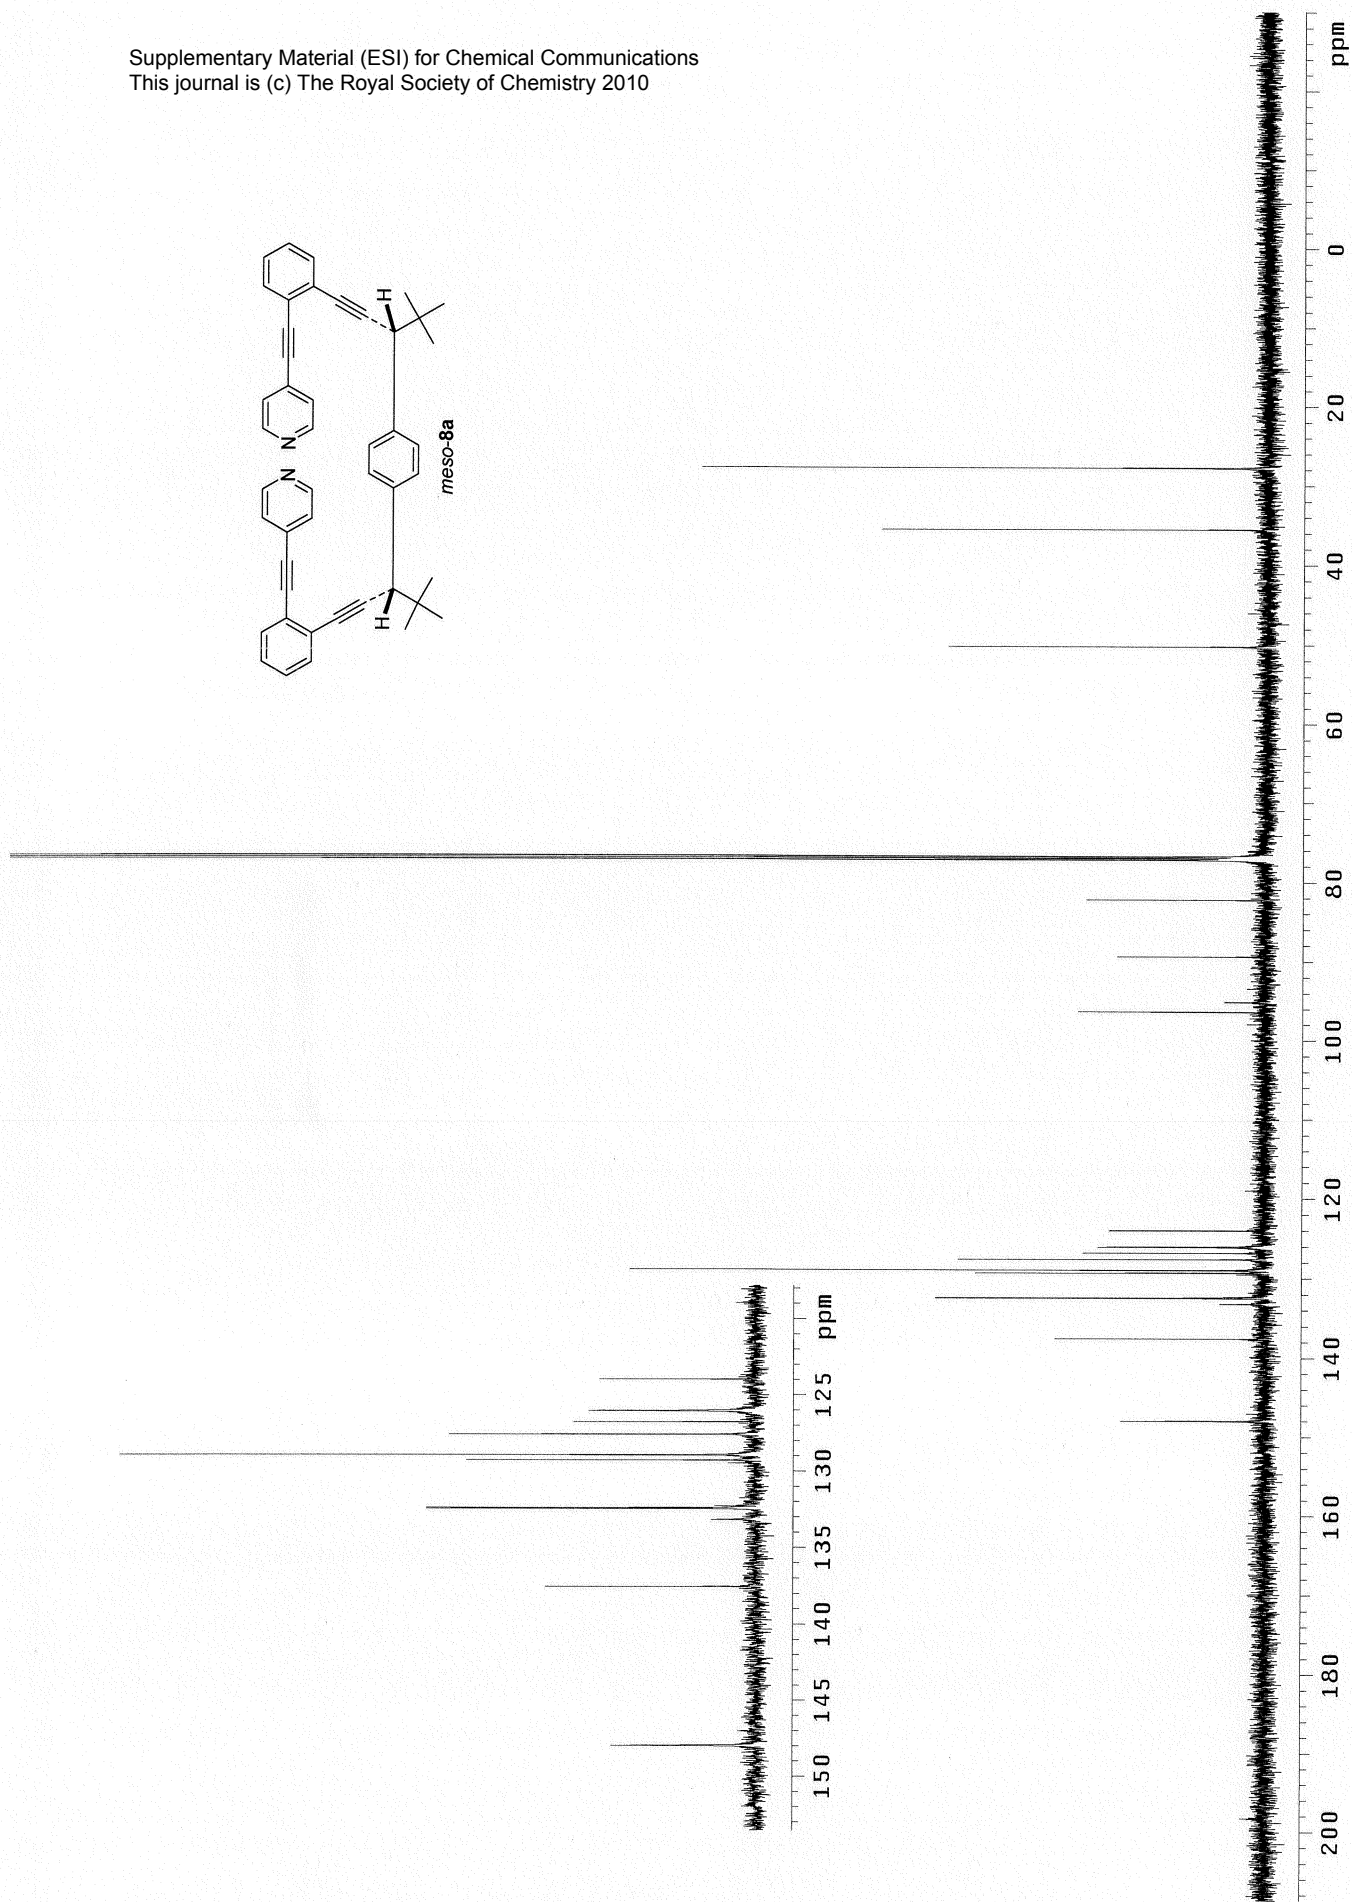

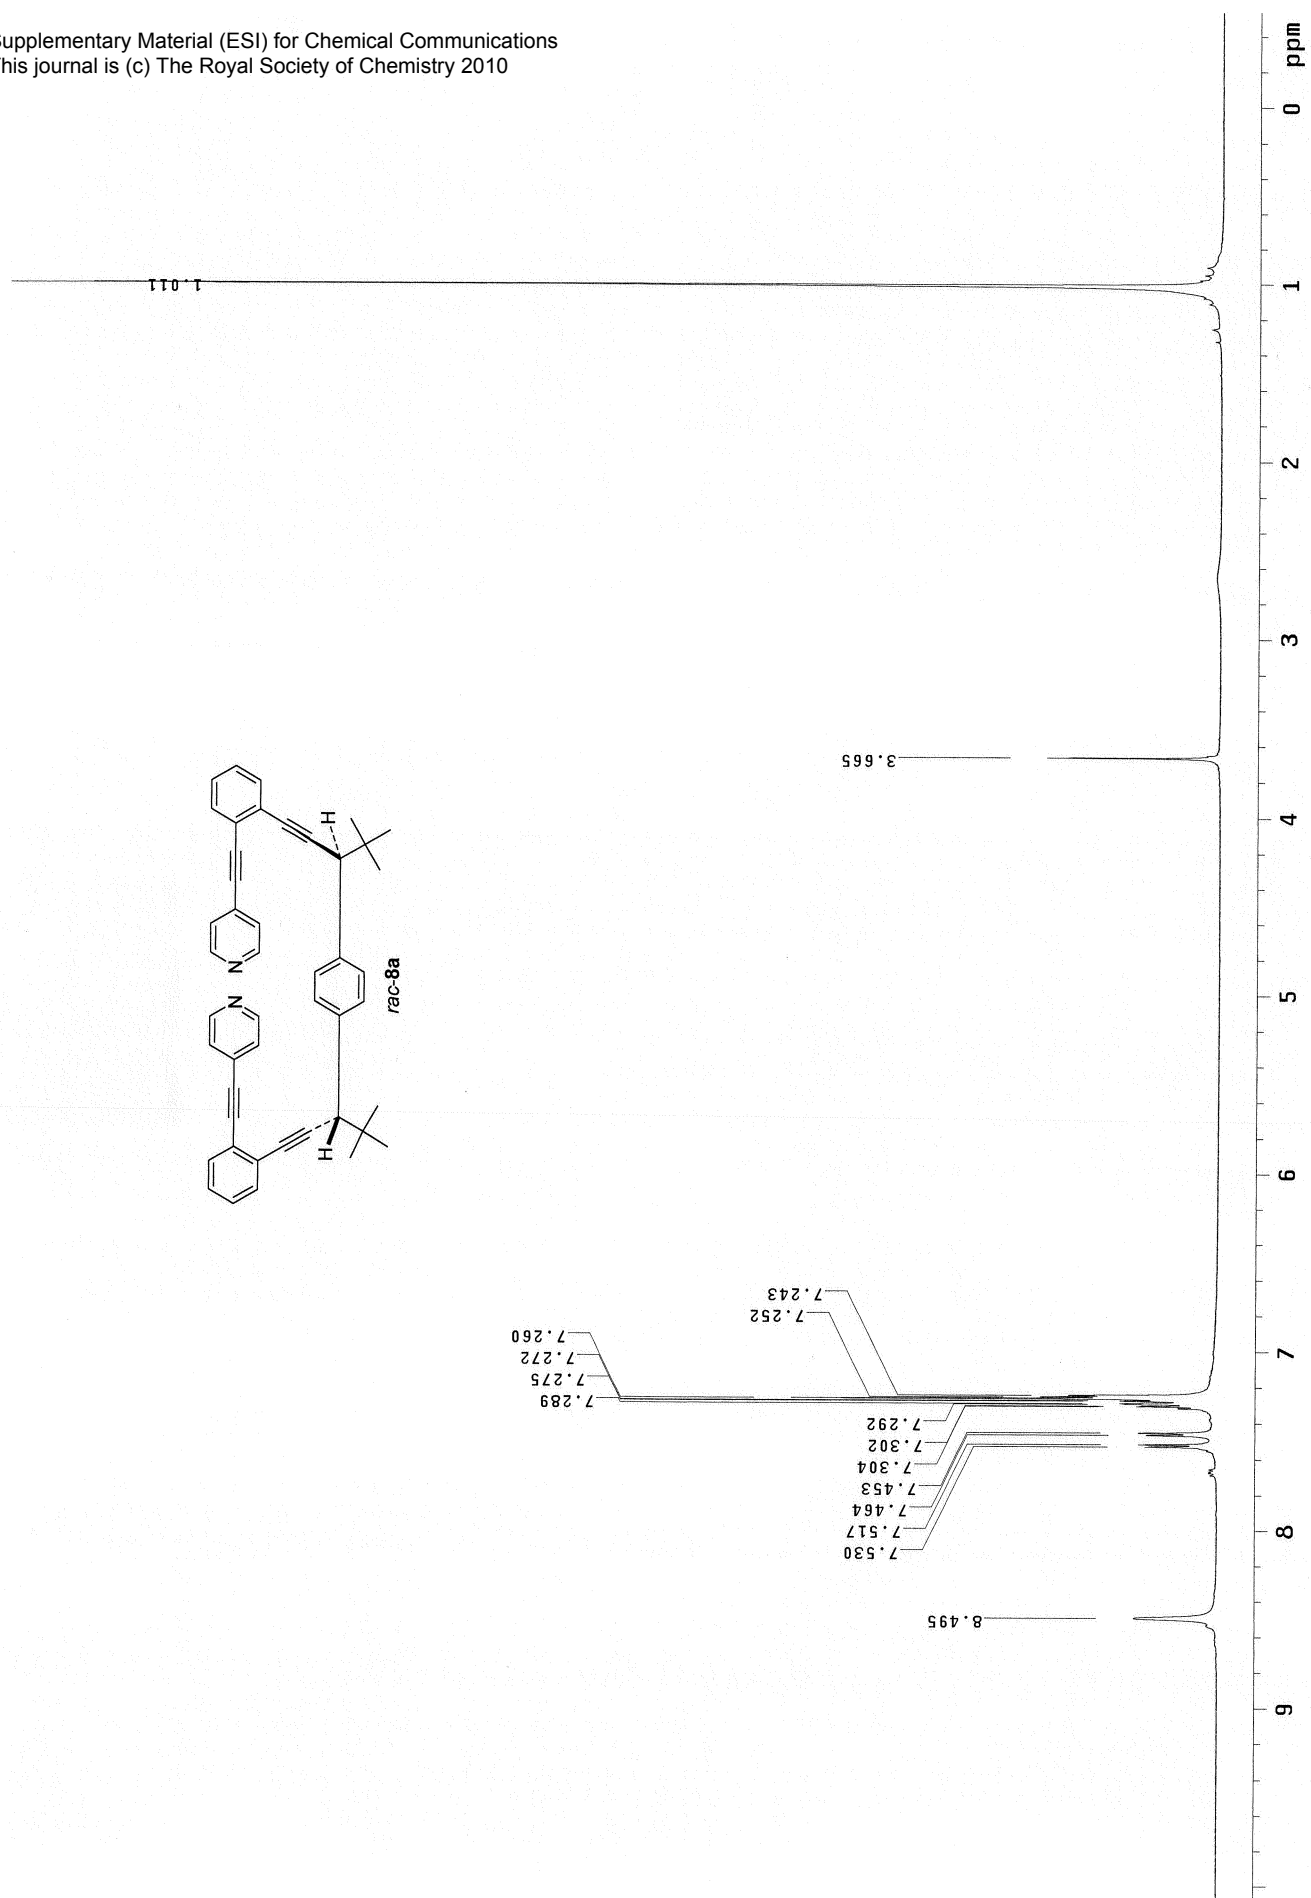

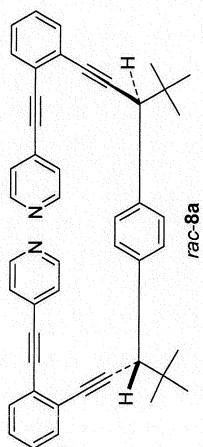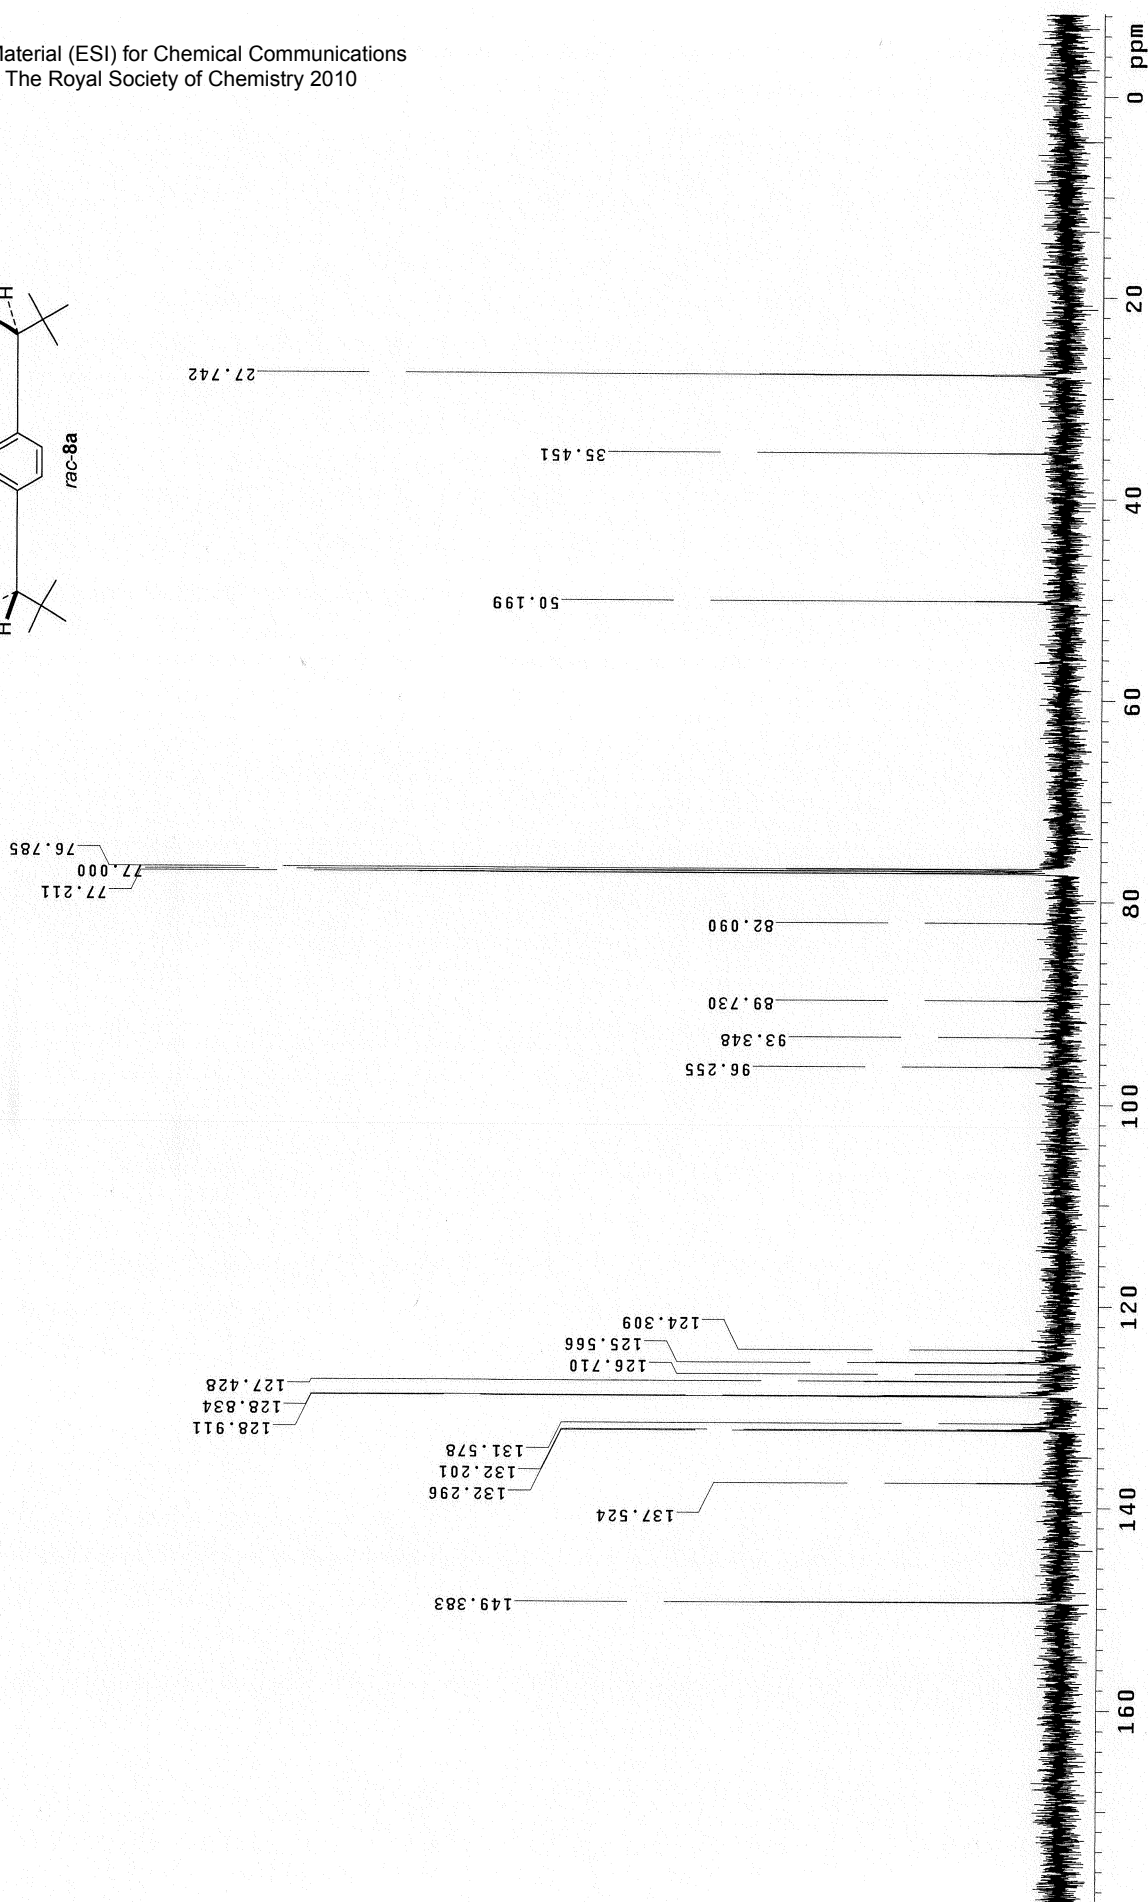



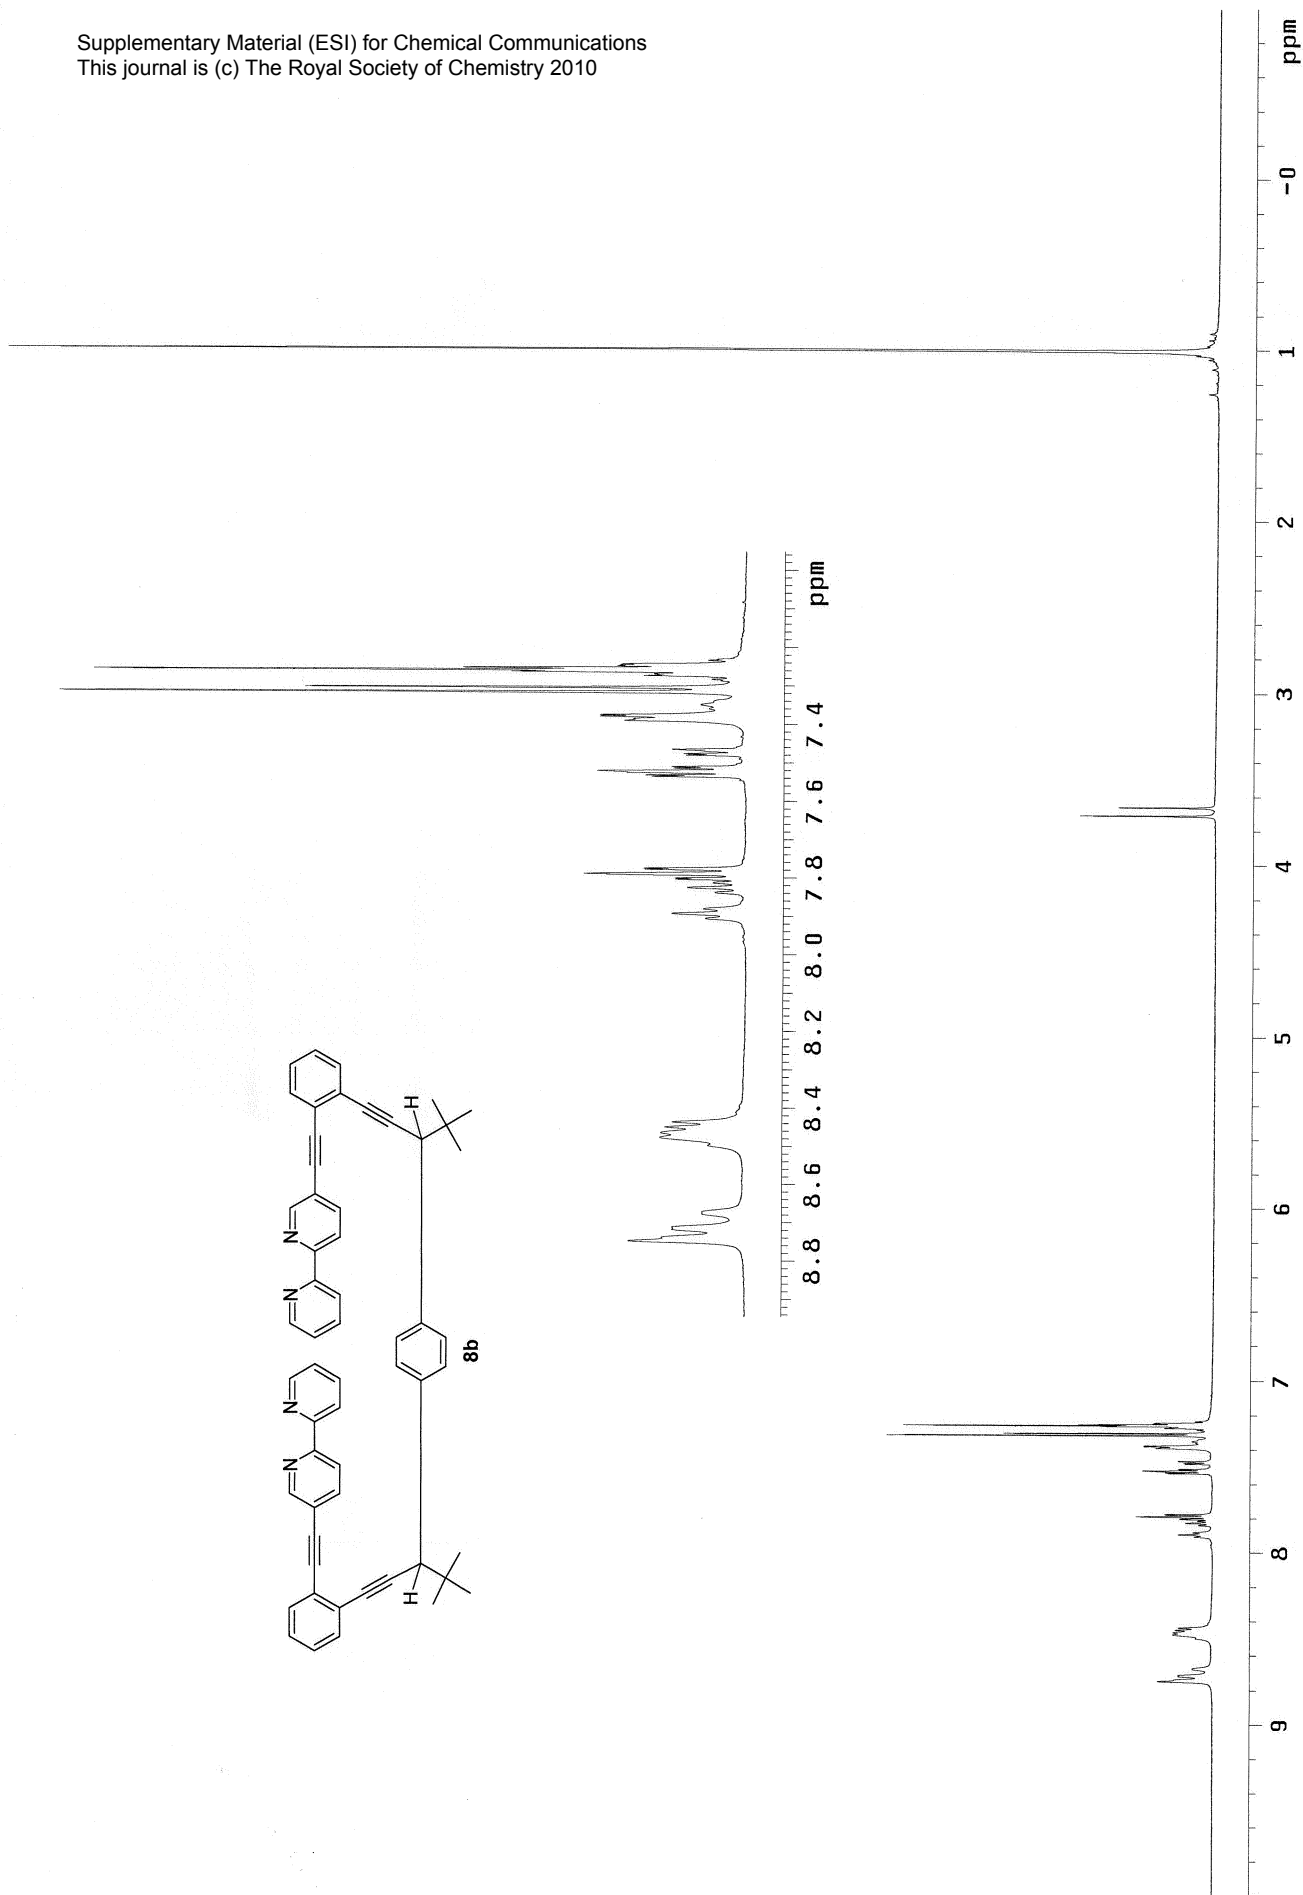

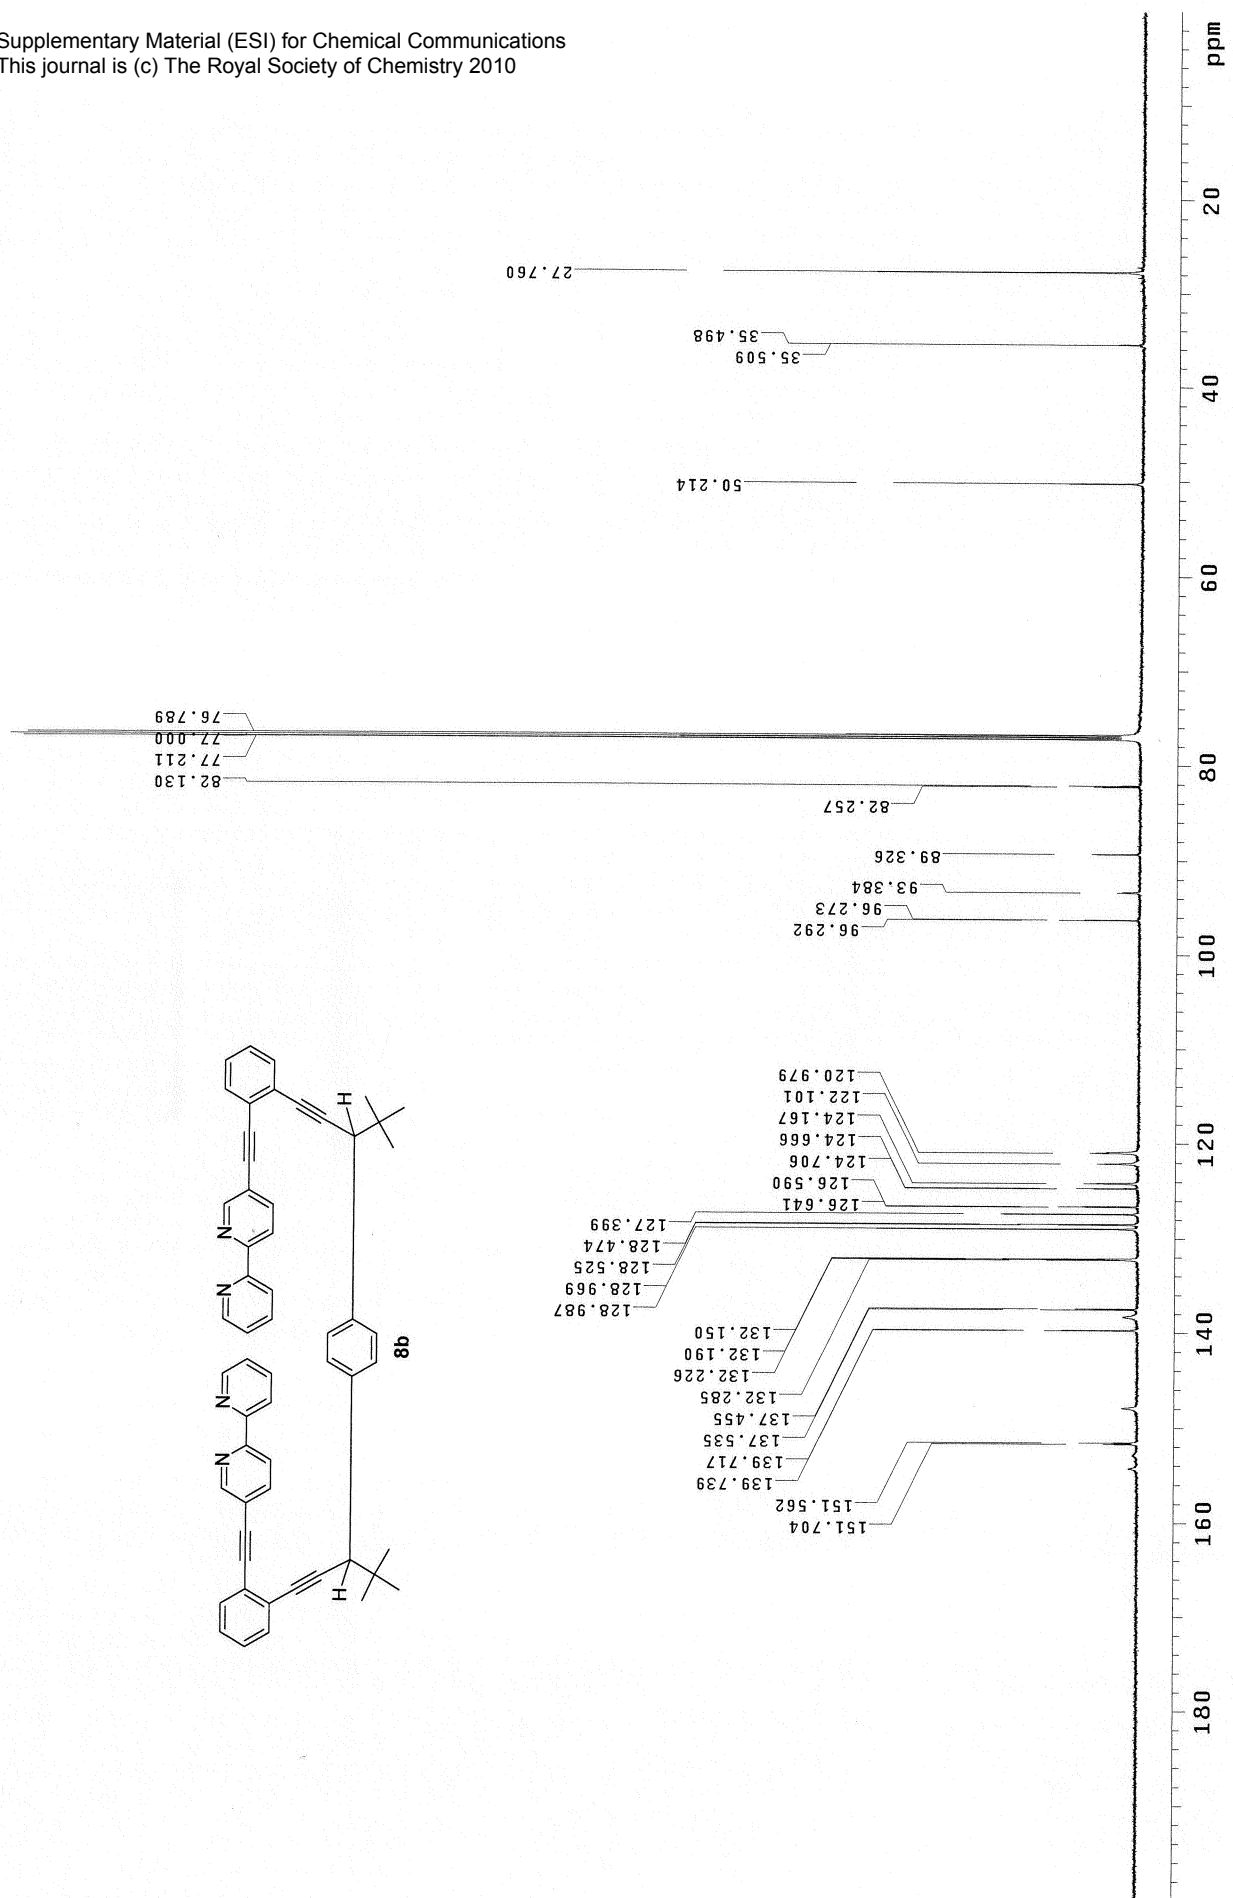

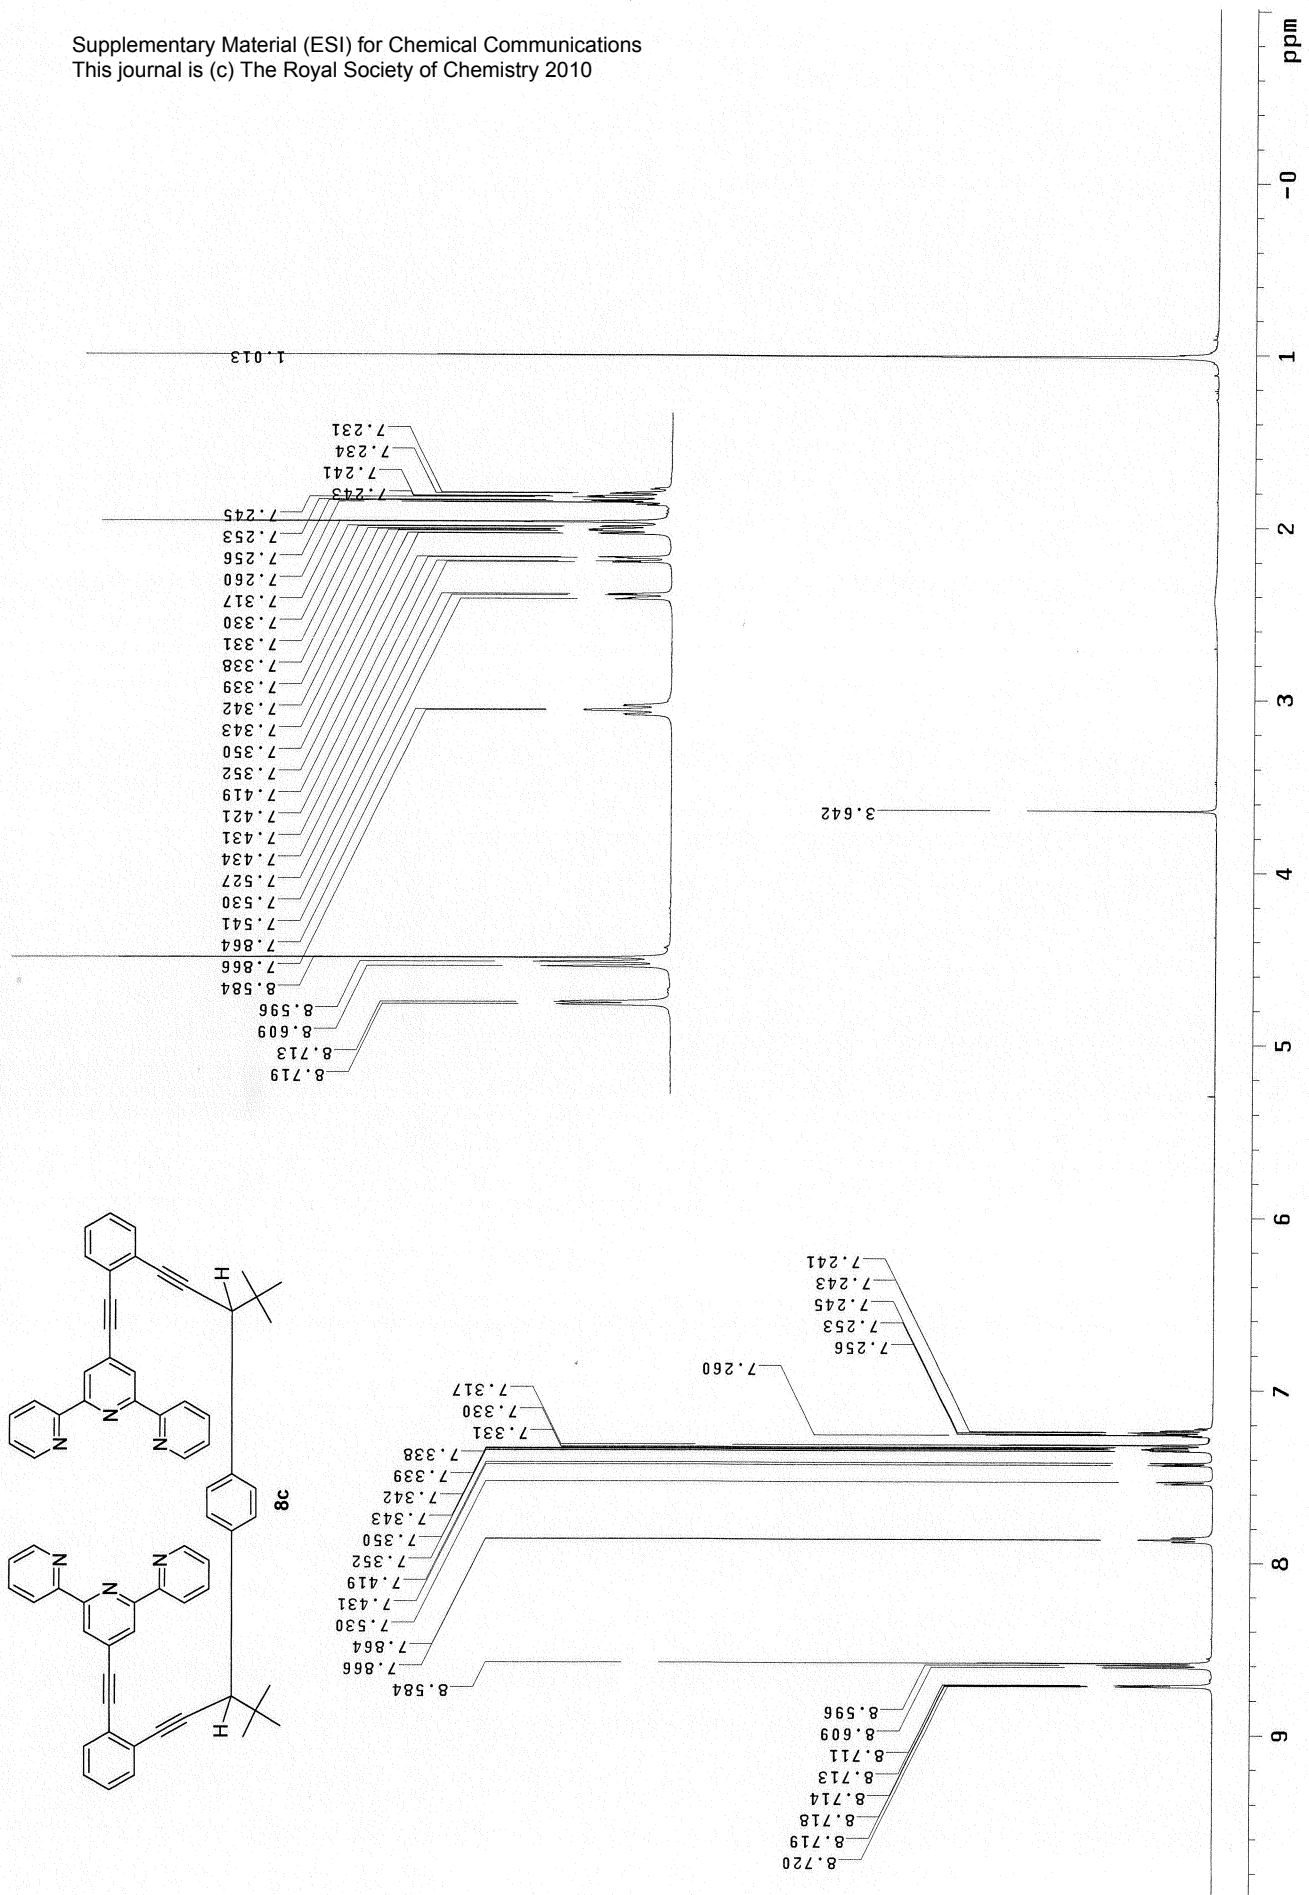

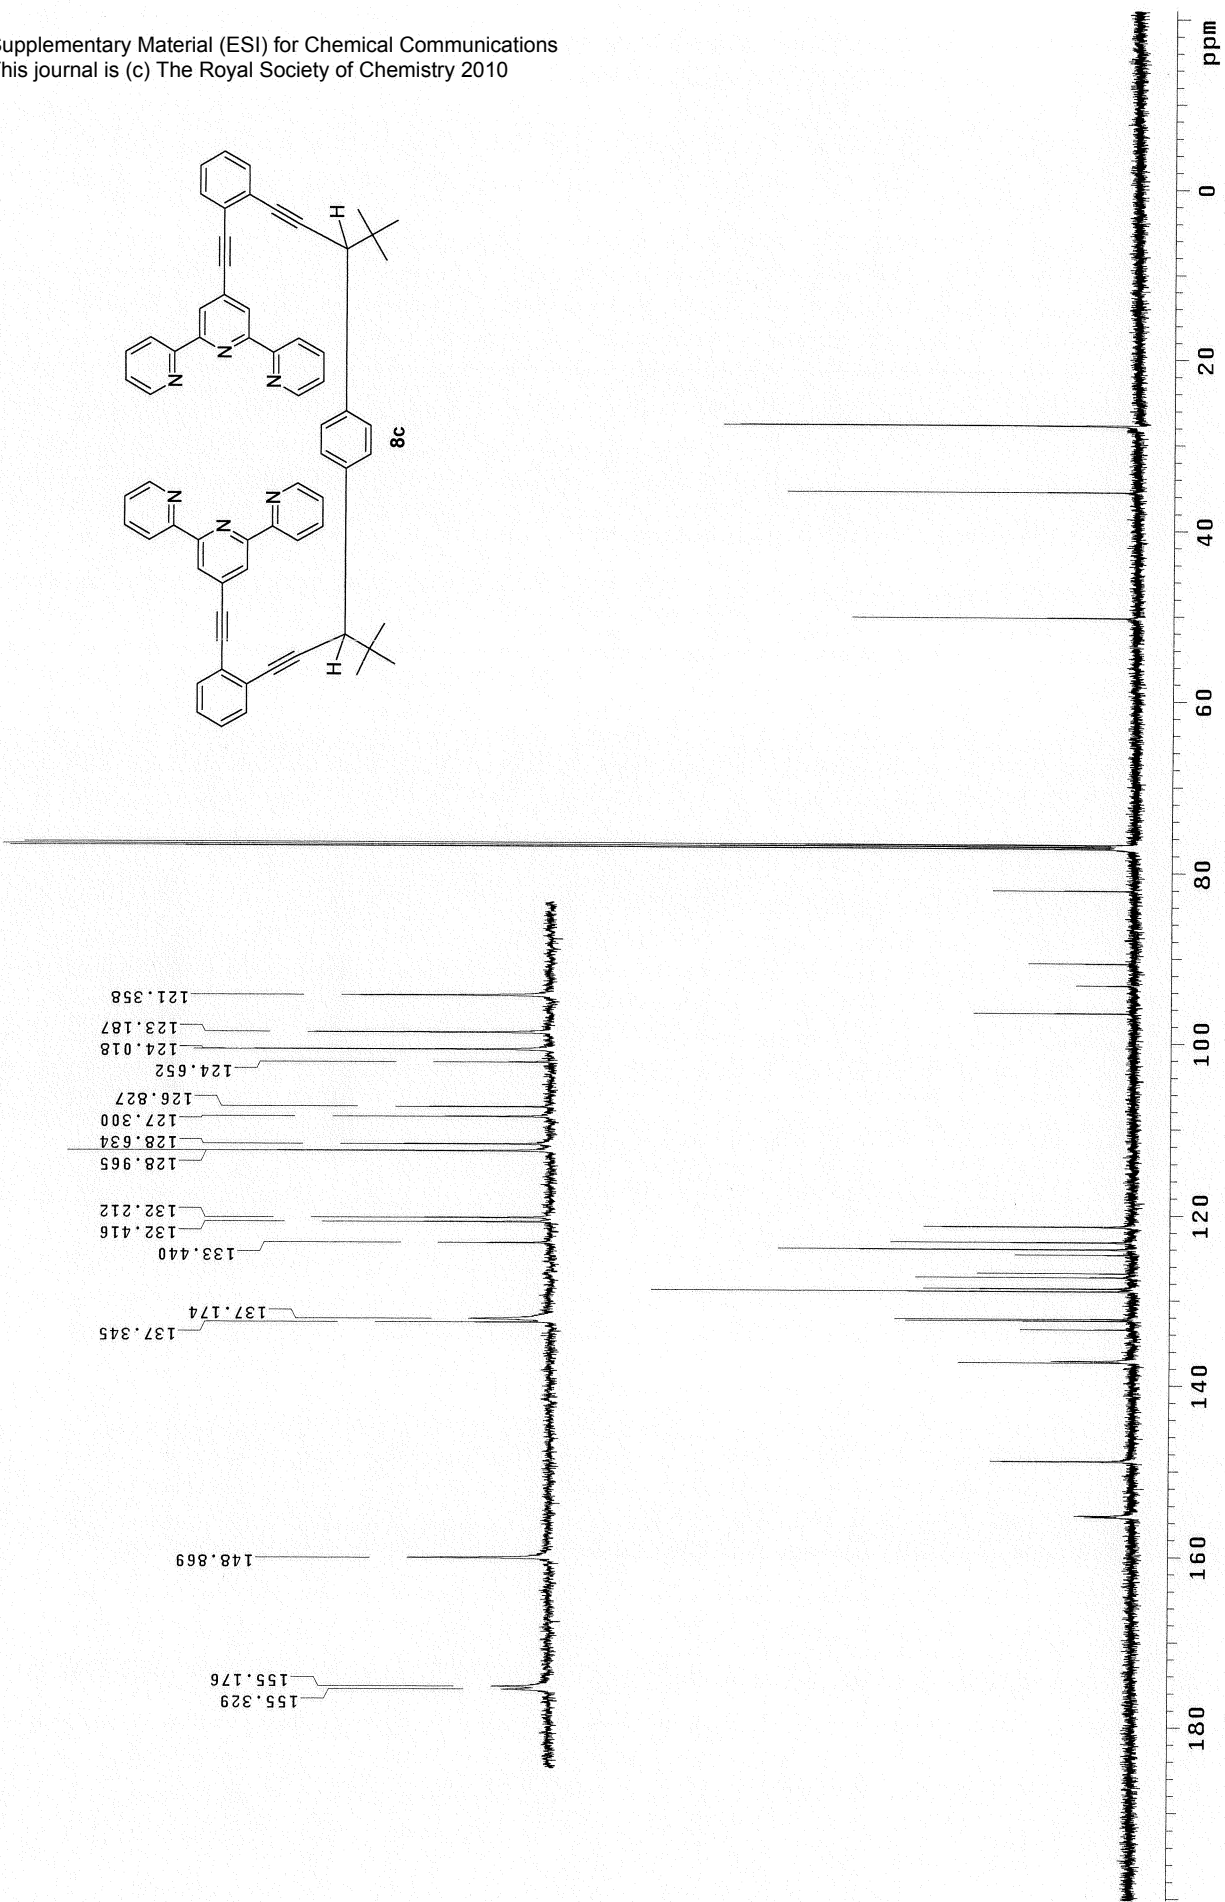

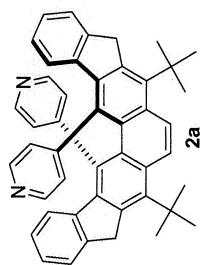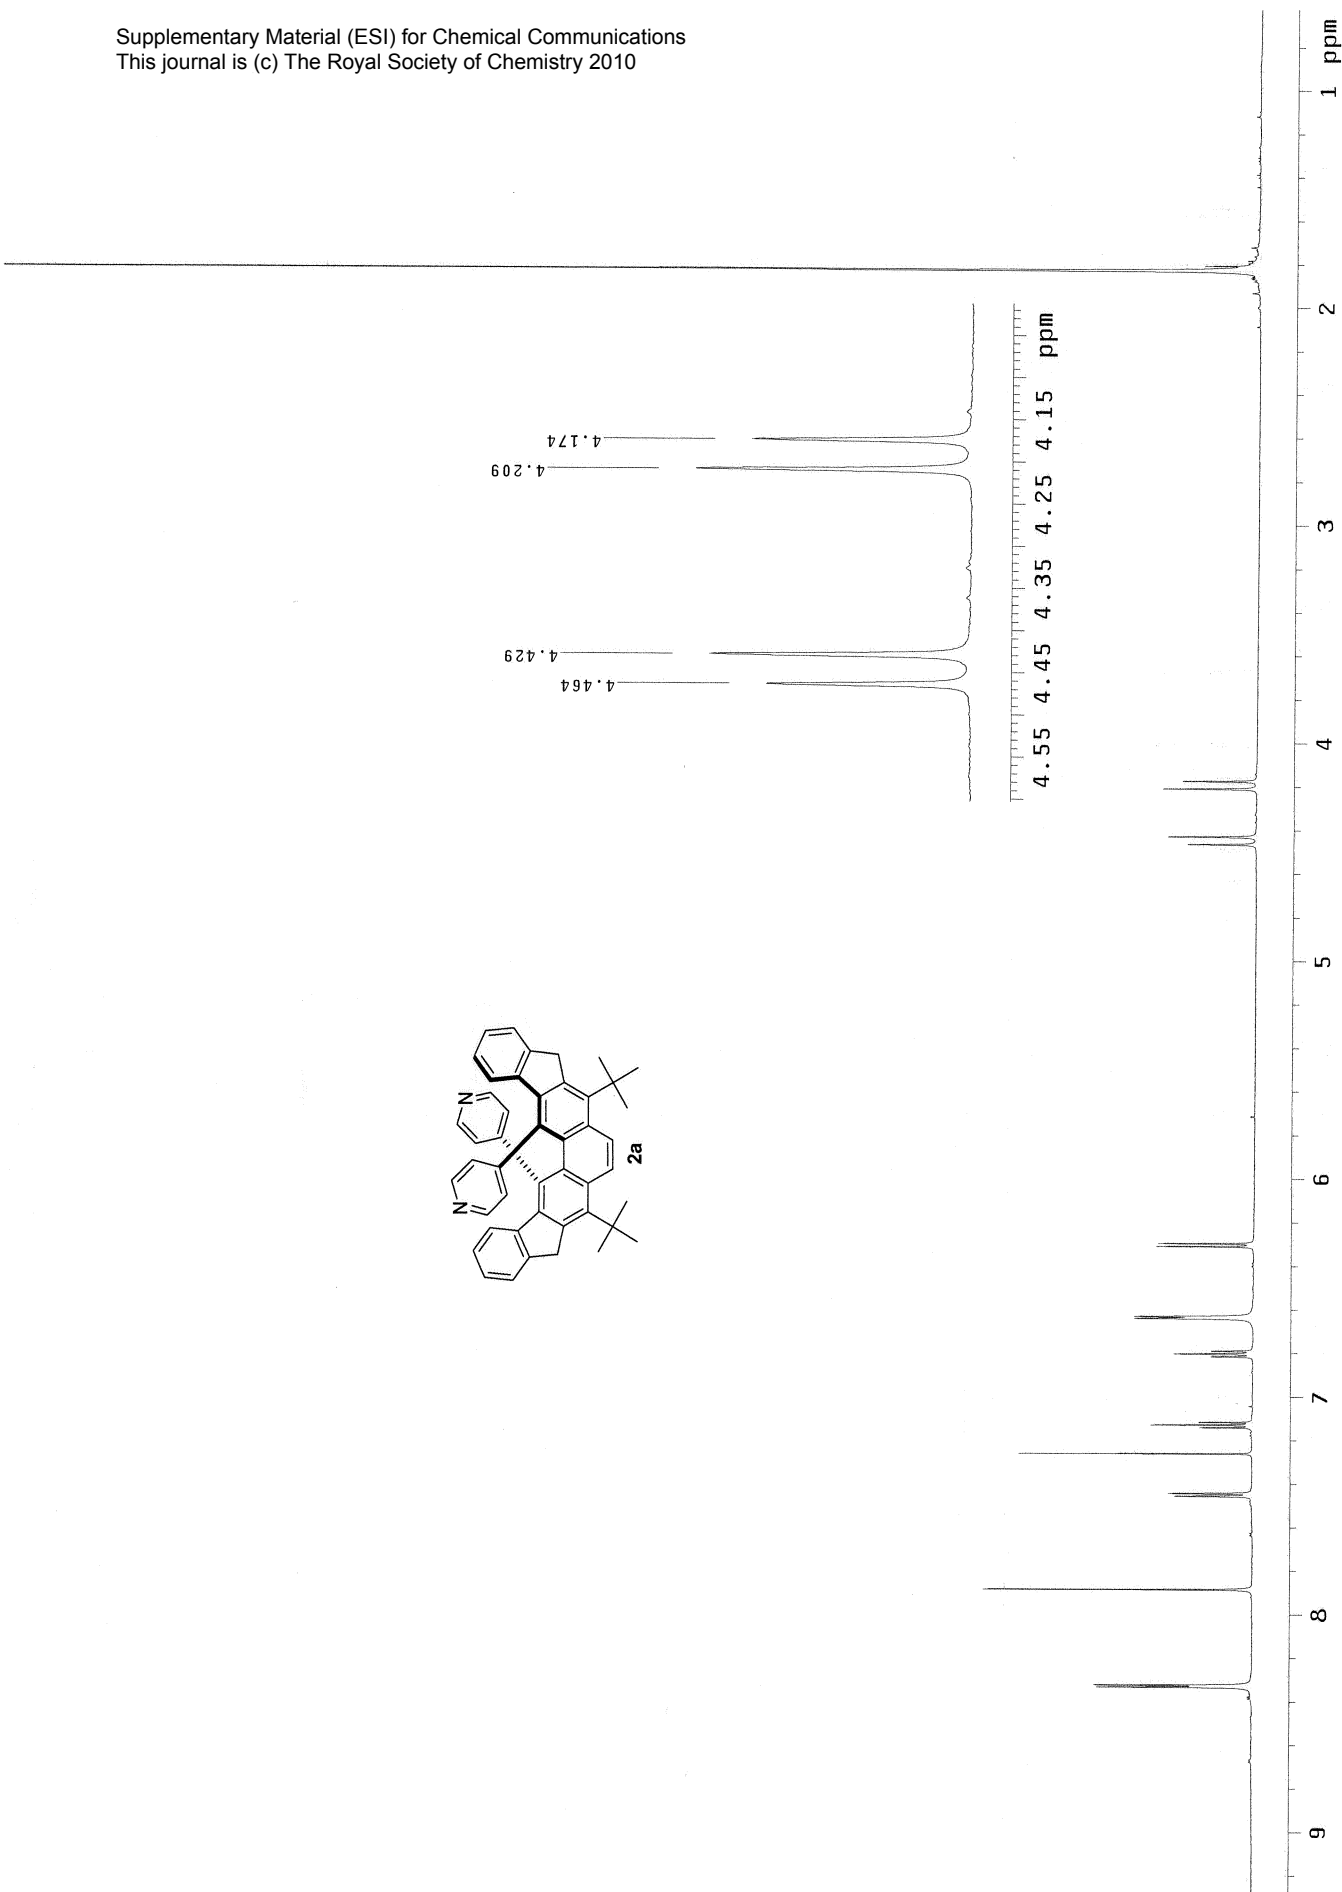

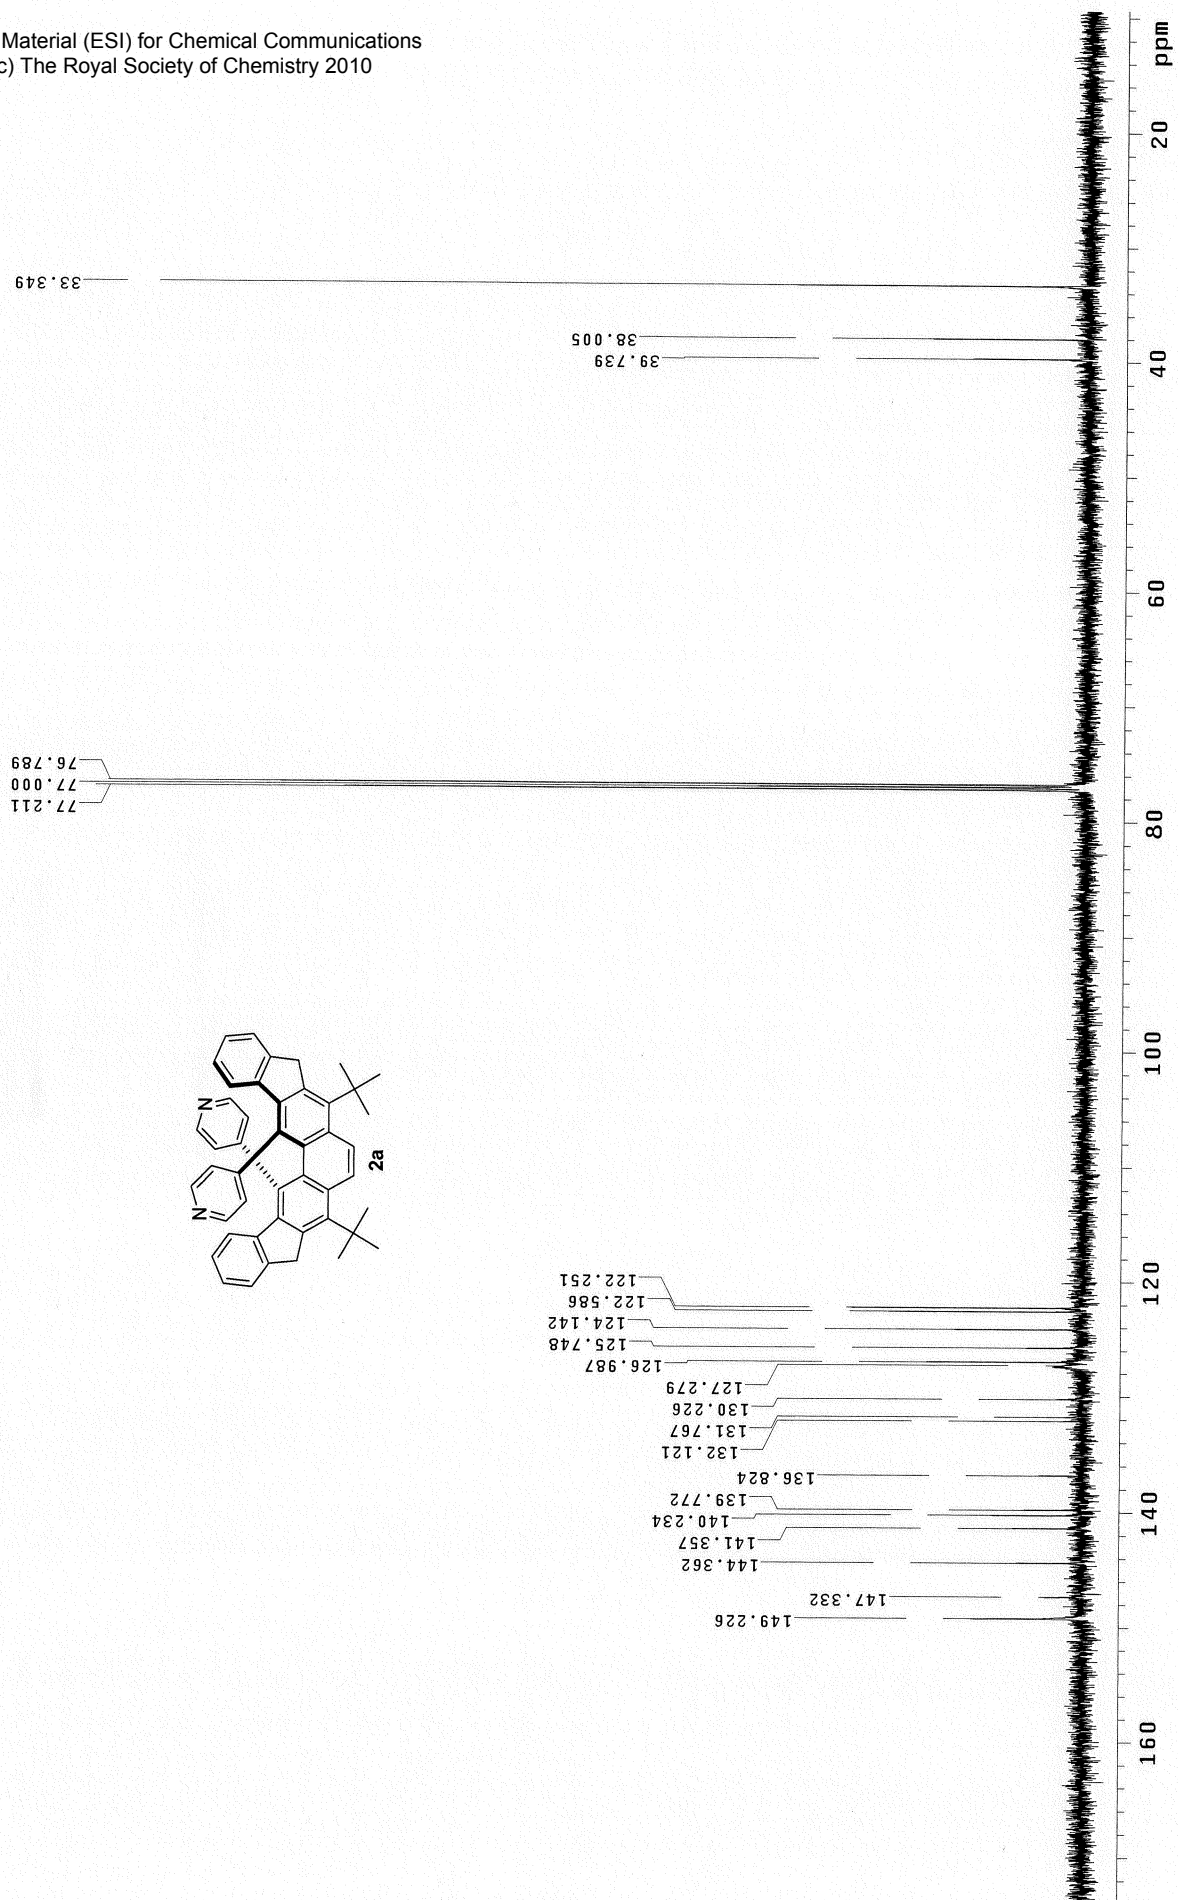

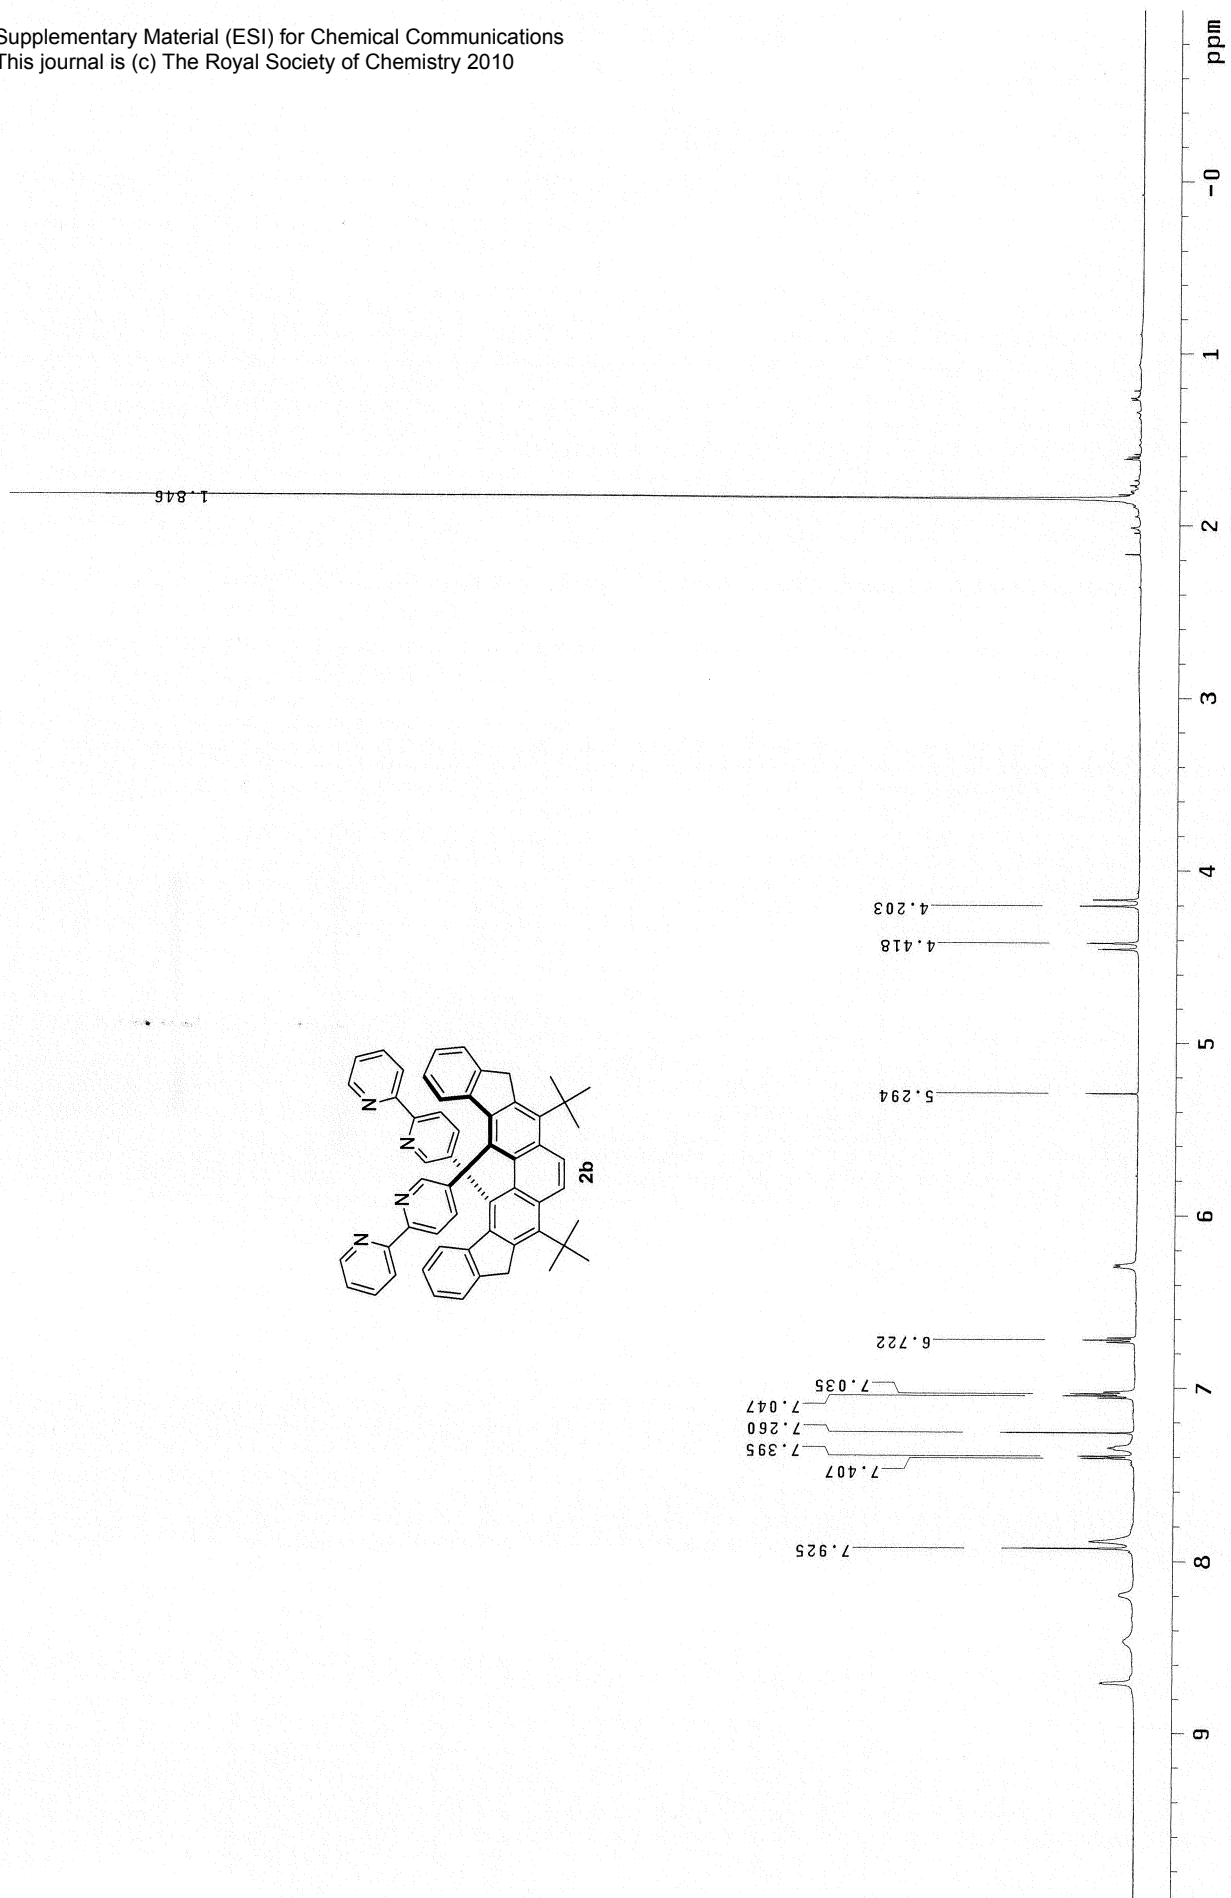



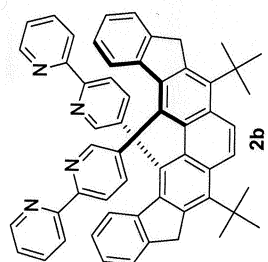

at 50 °C

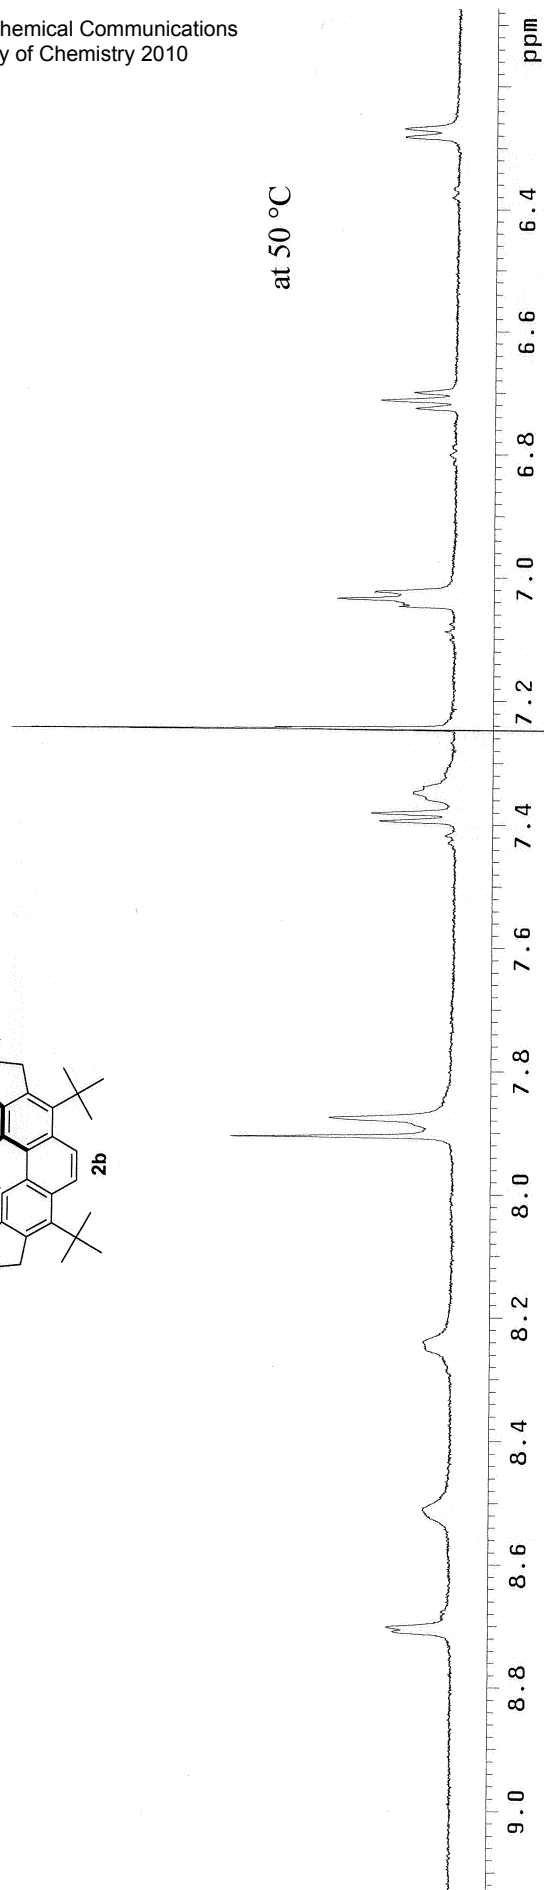

at 28 °C

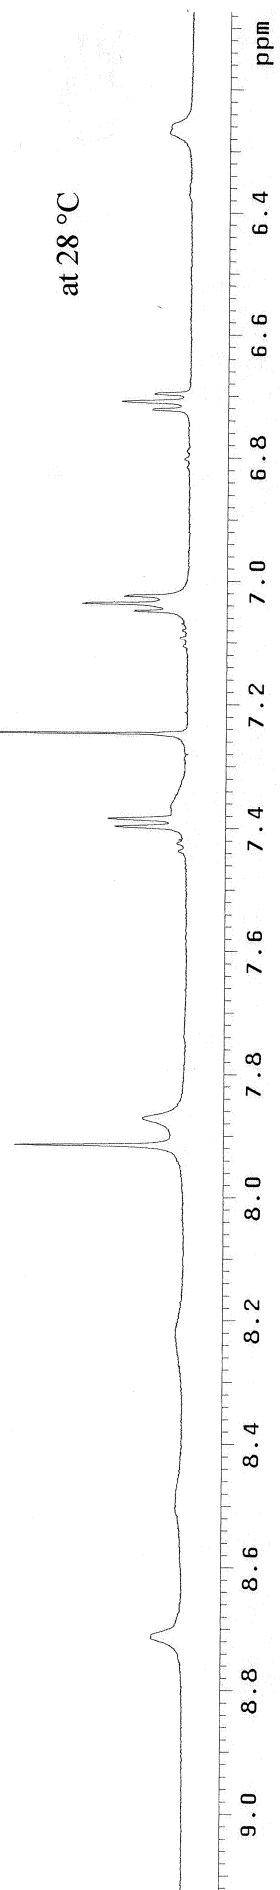

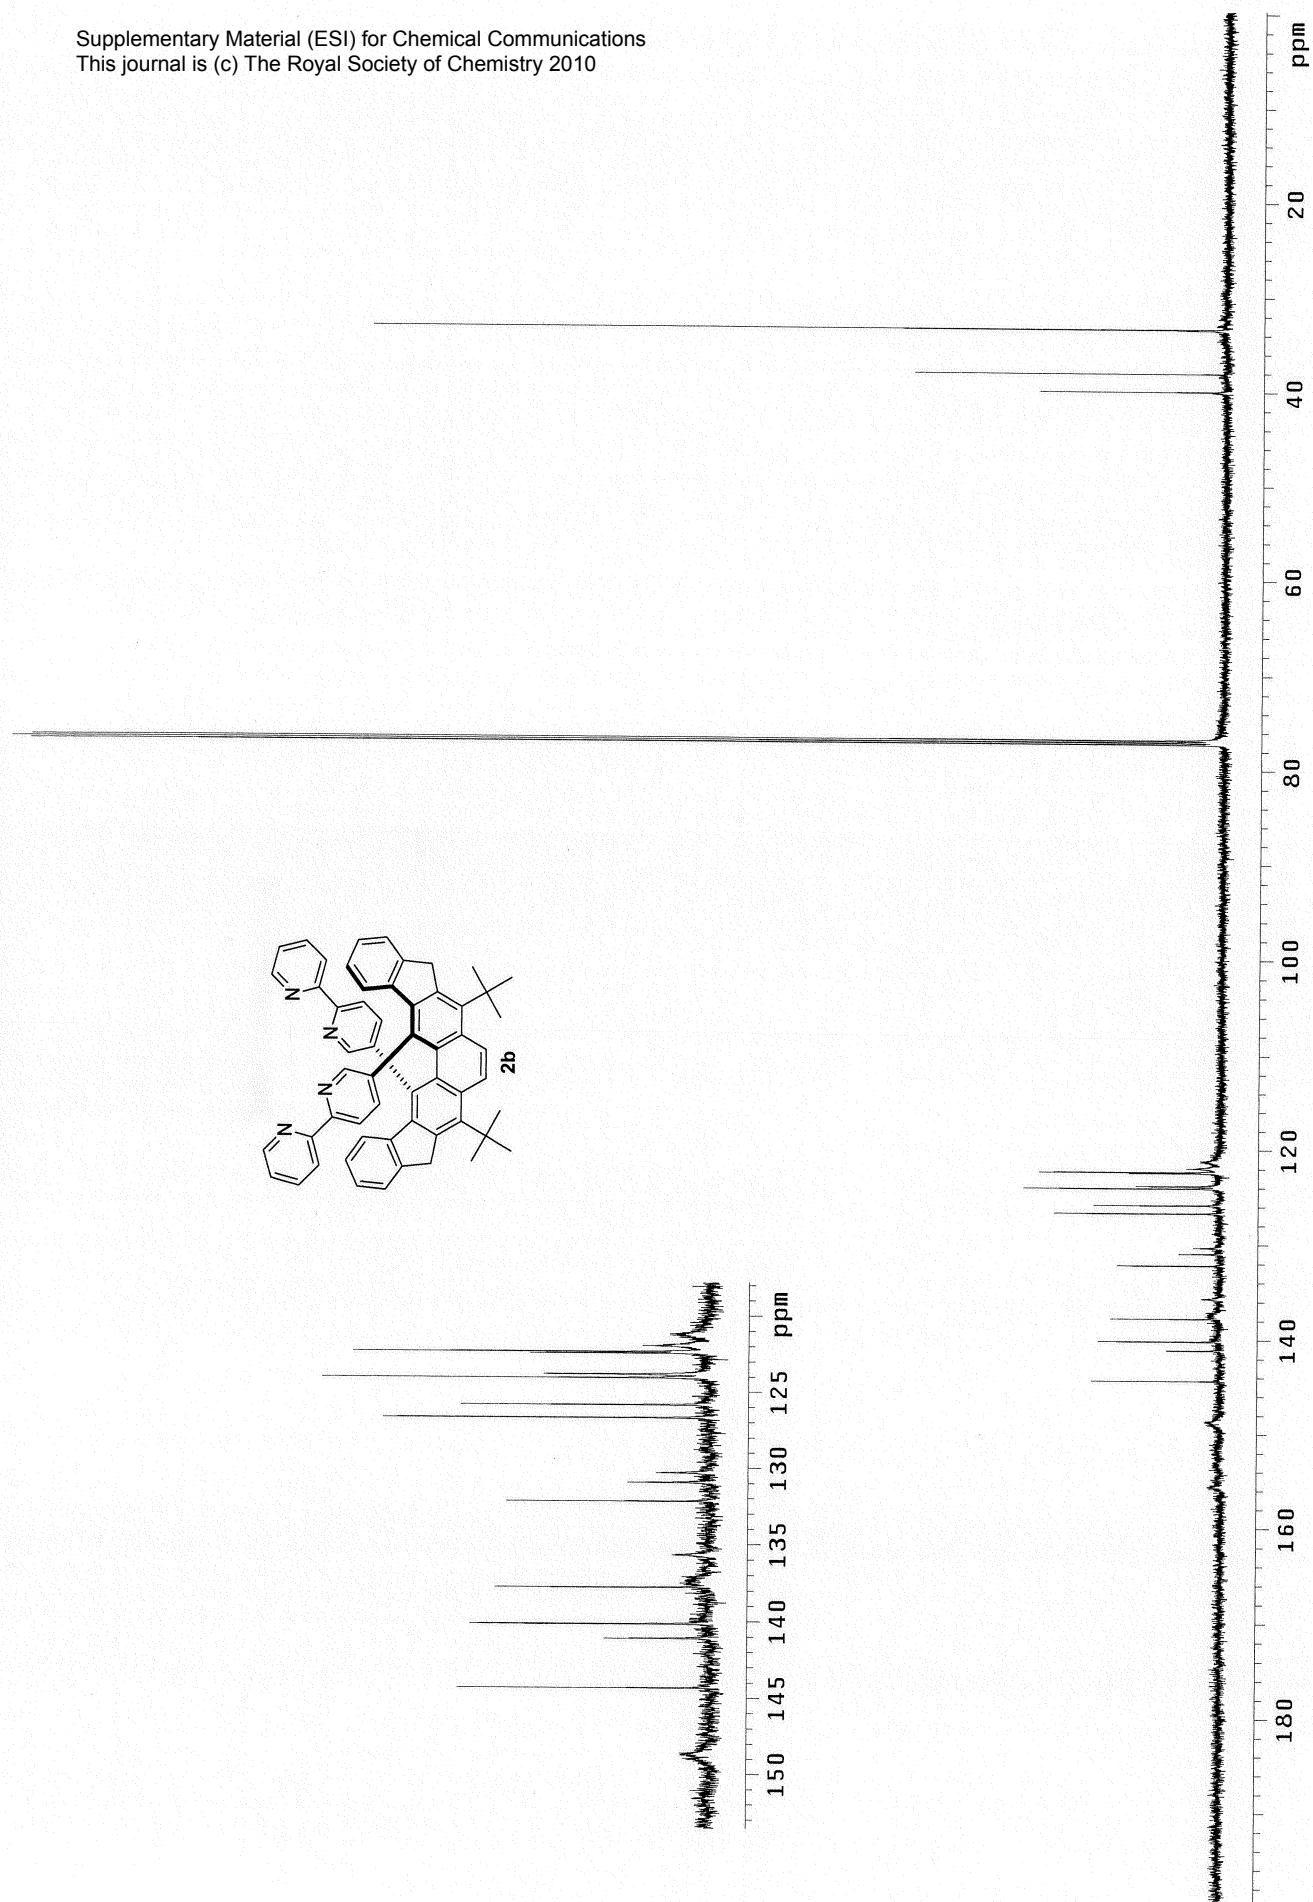

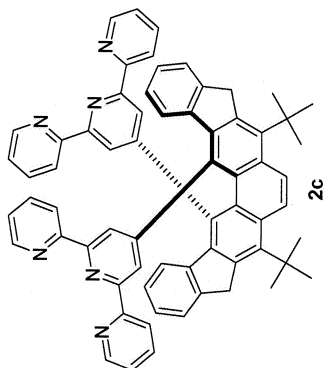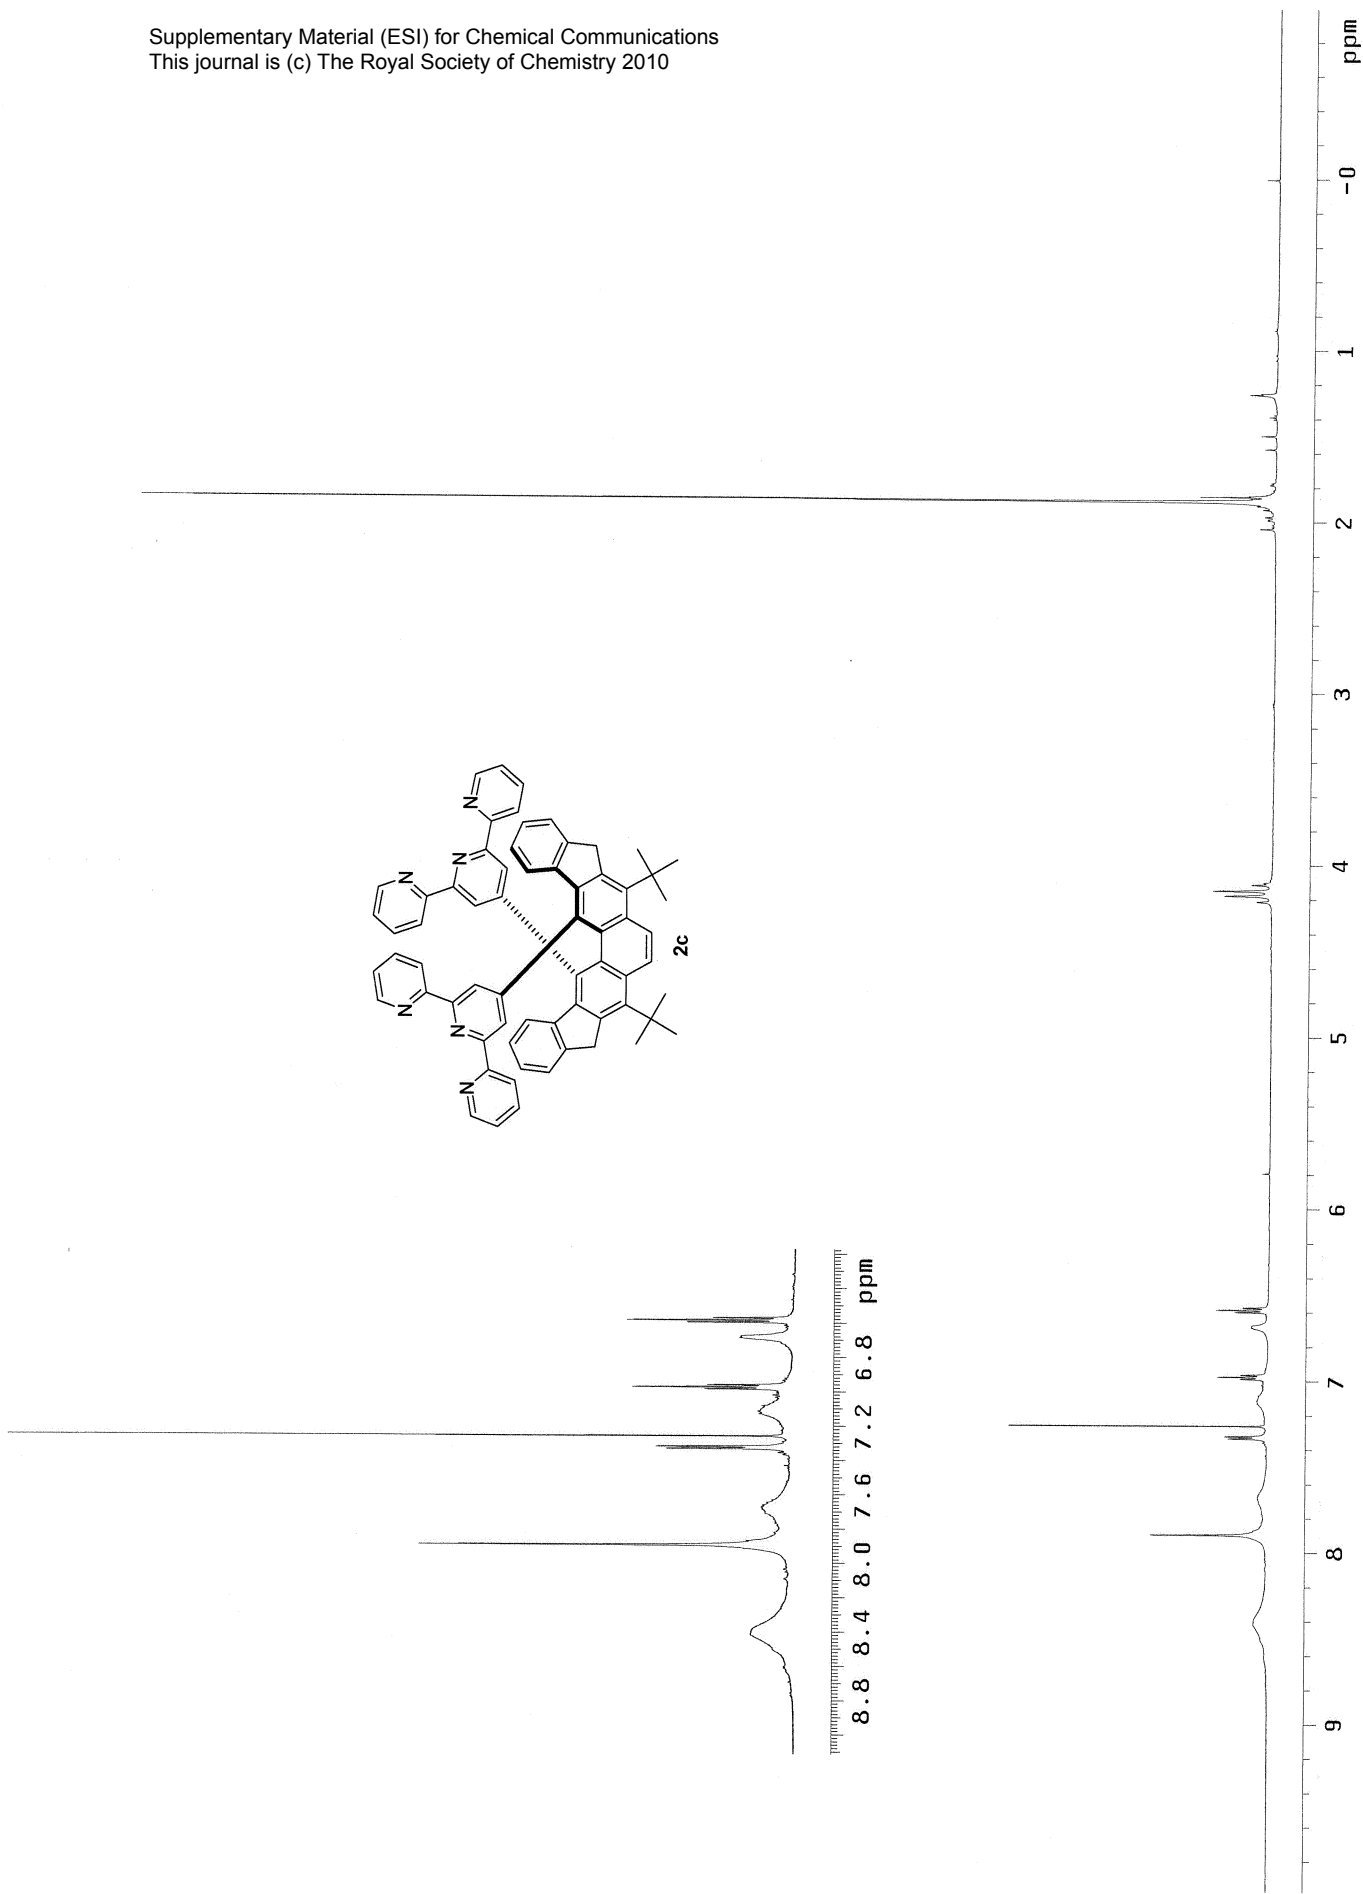

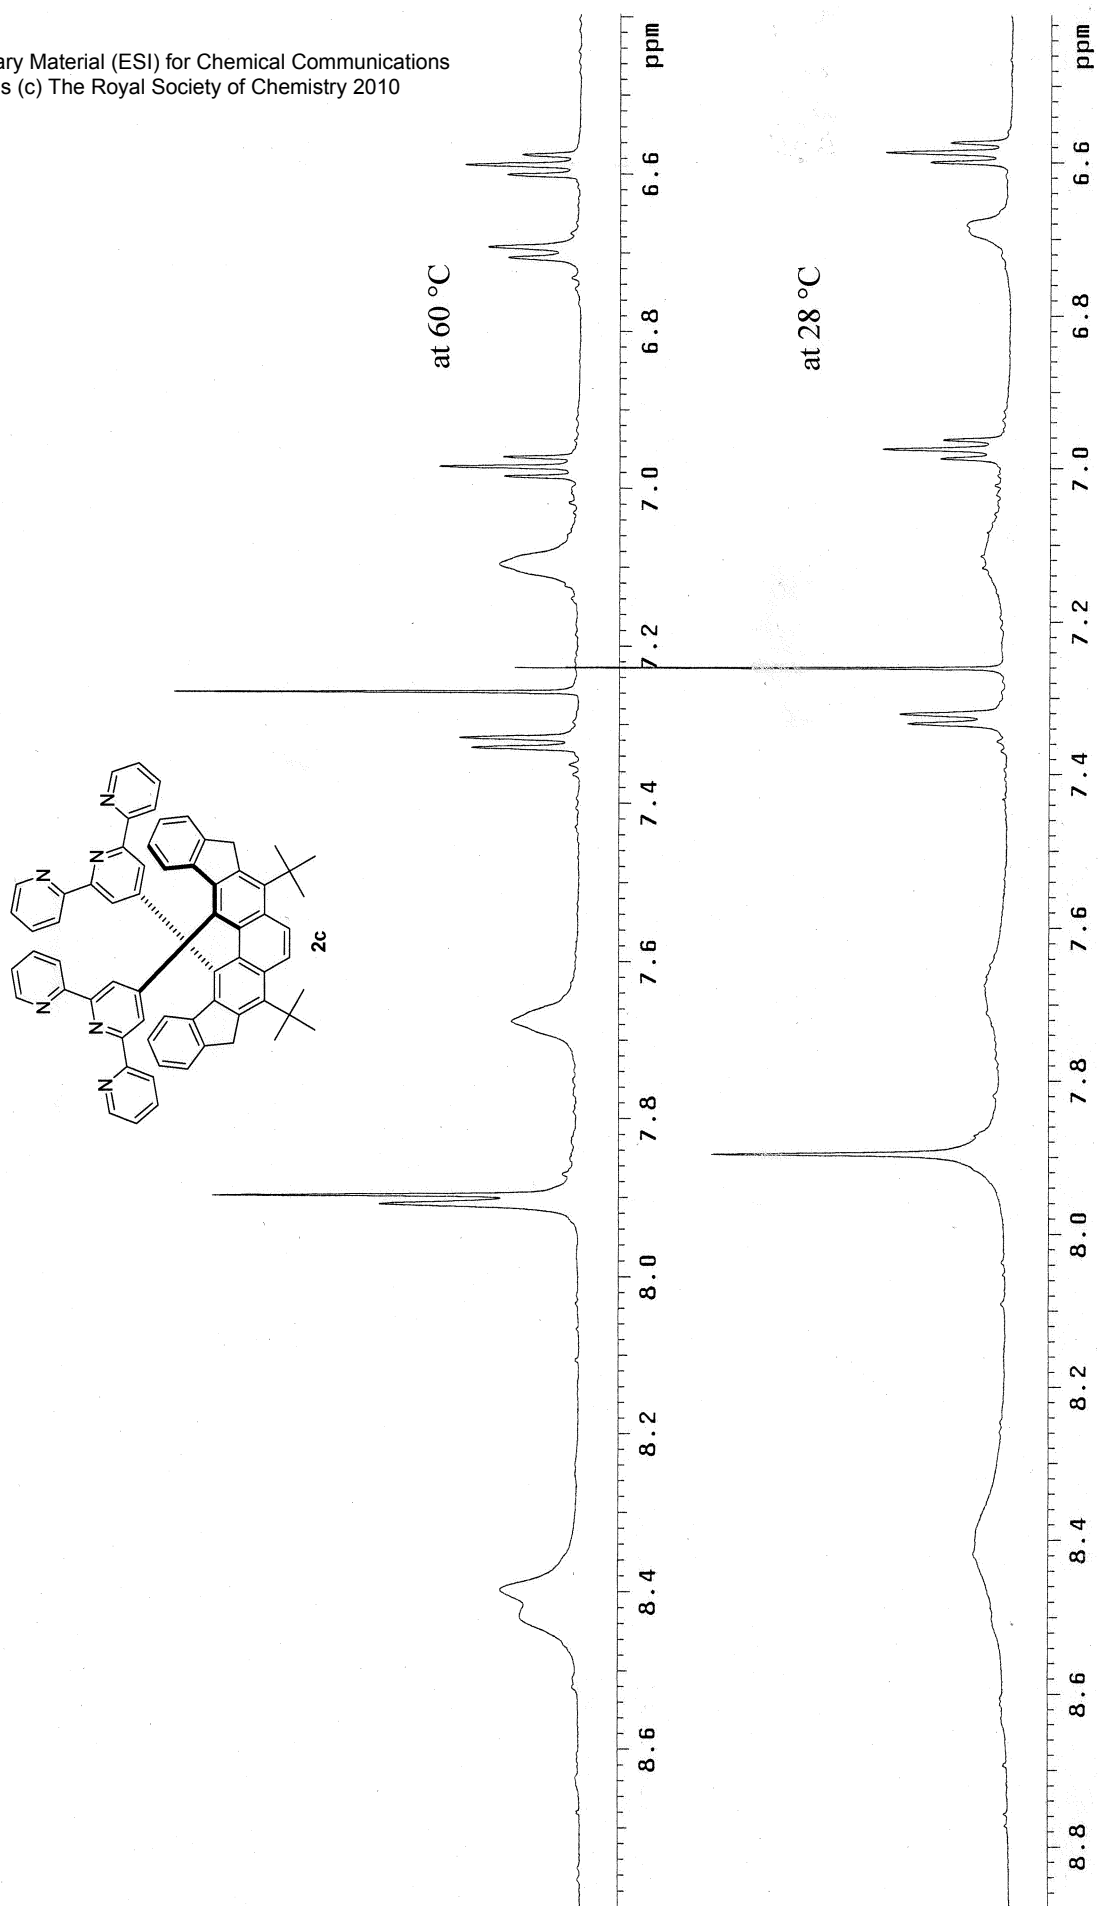

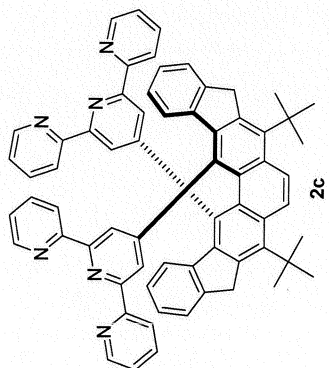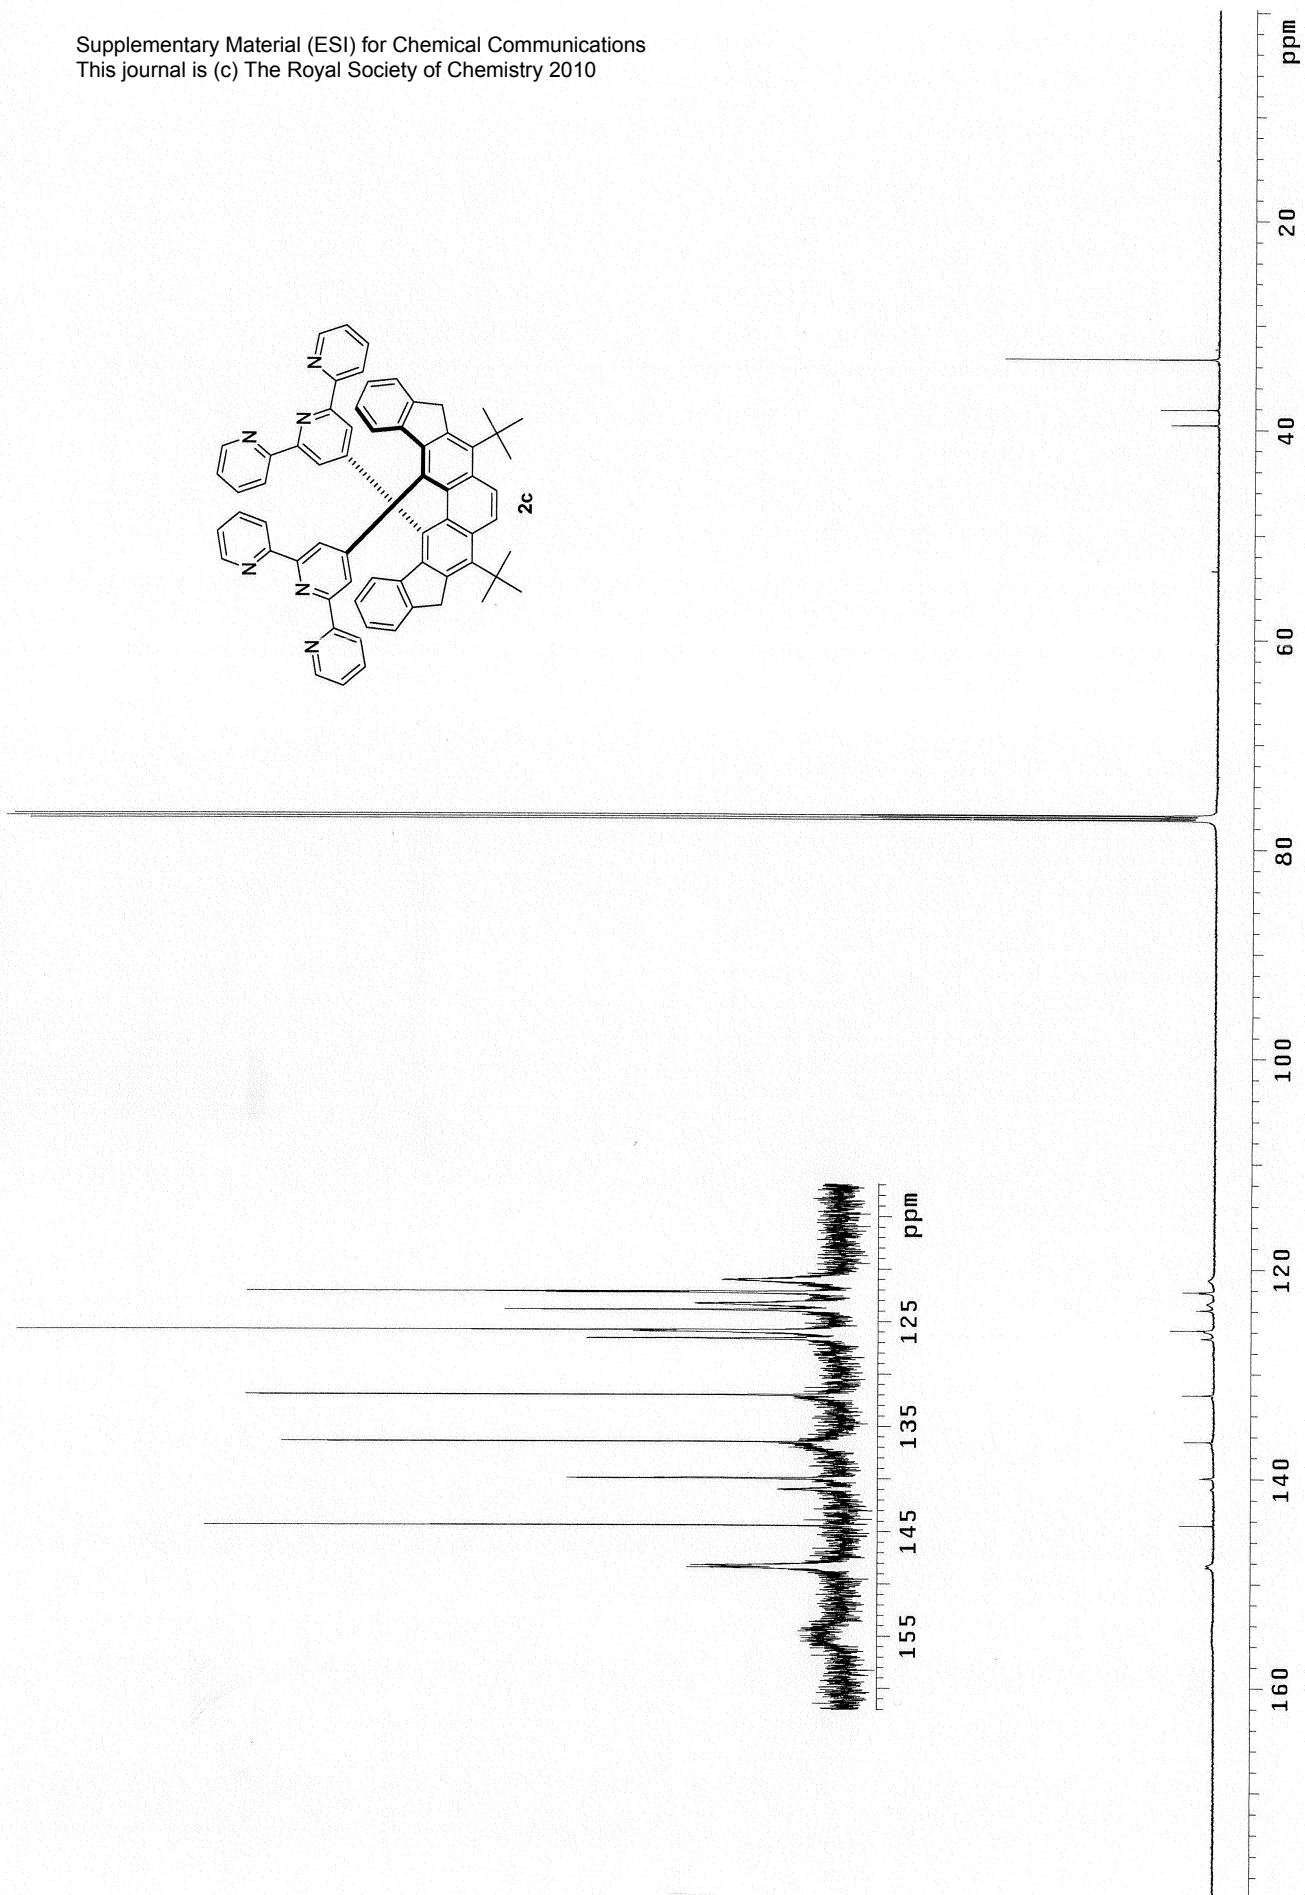

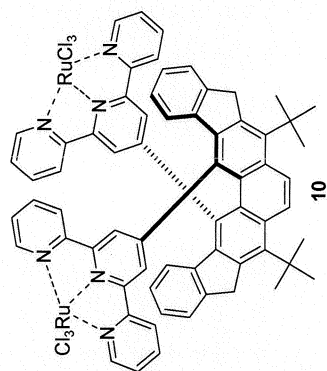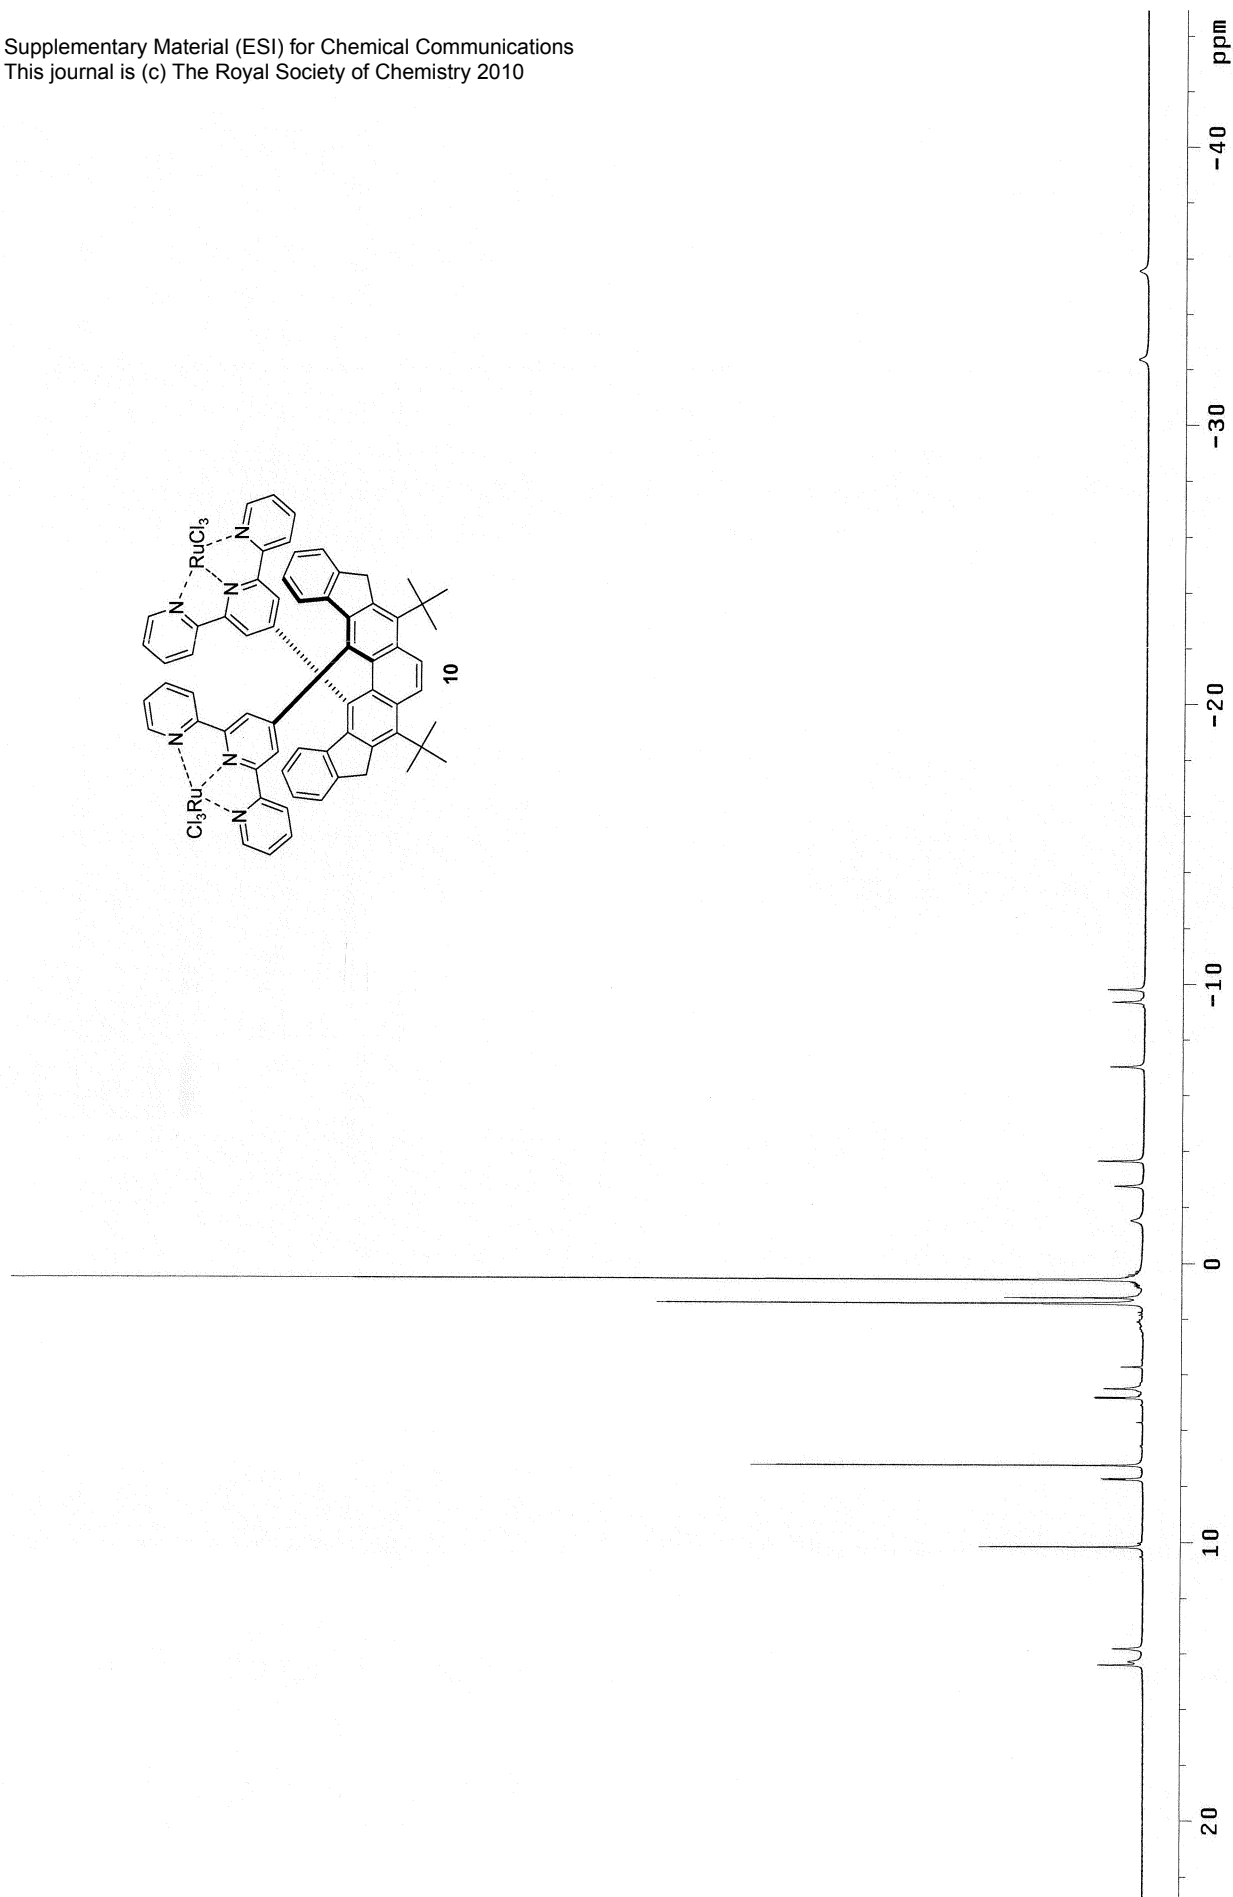

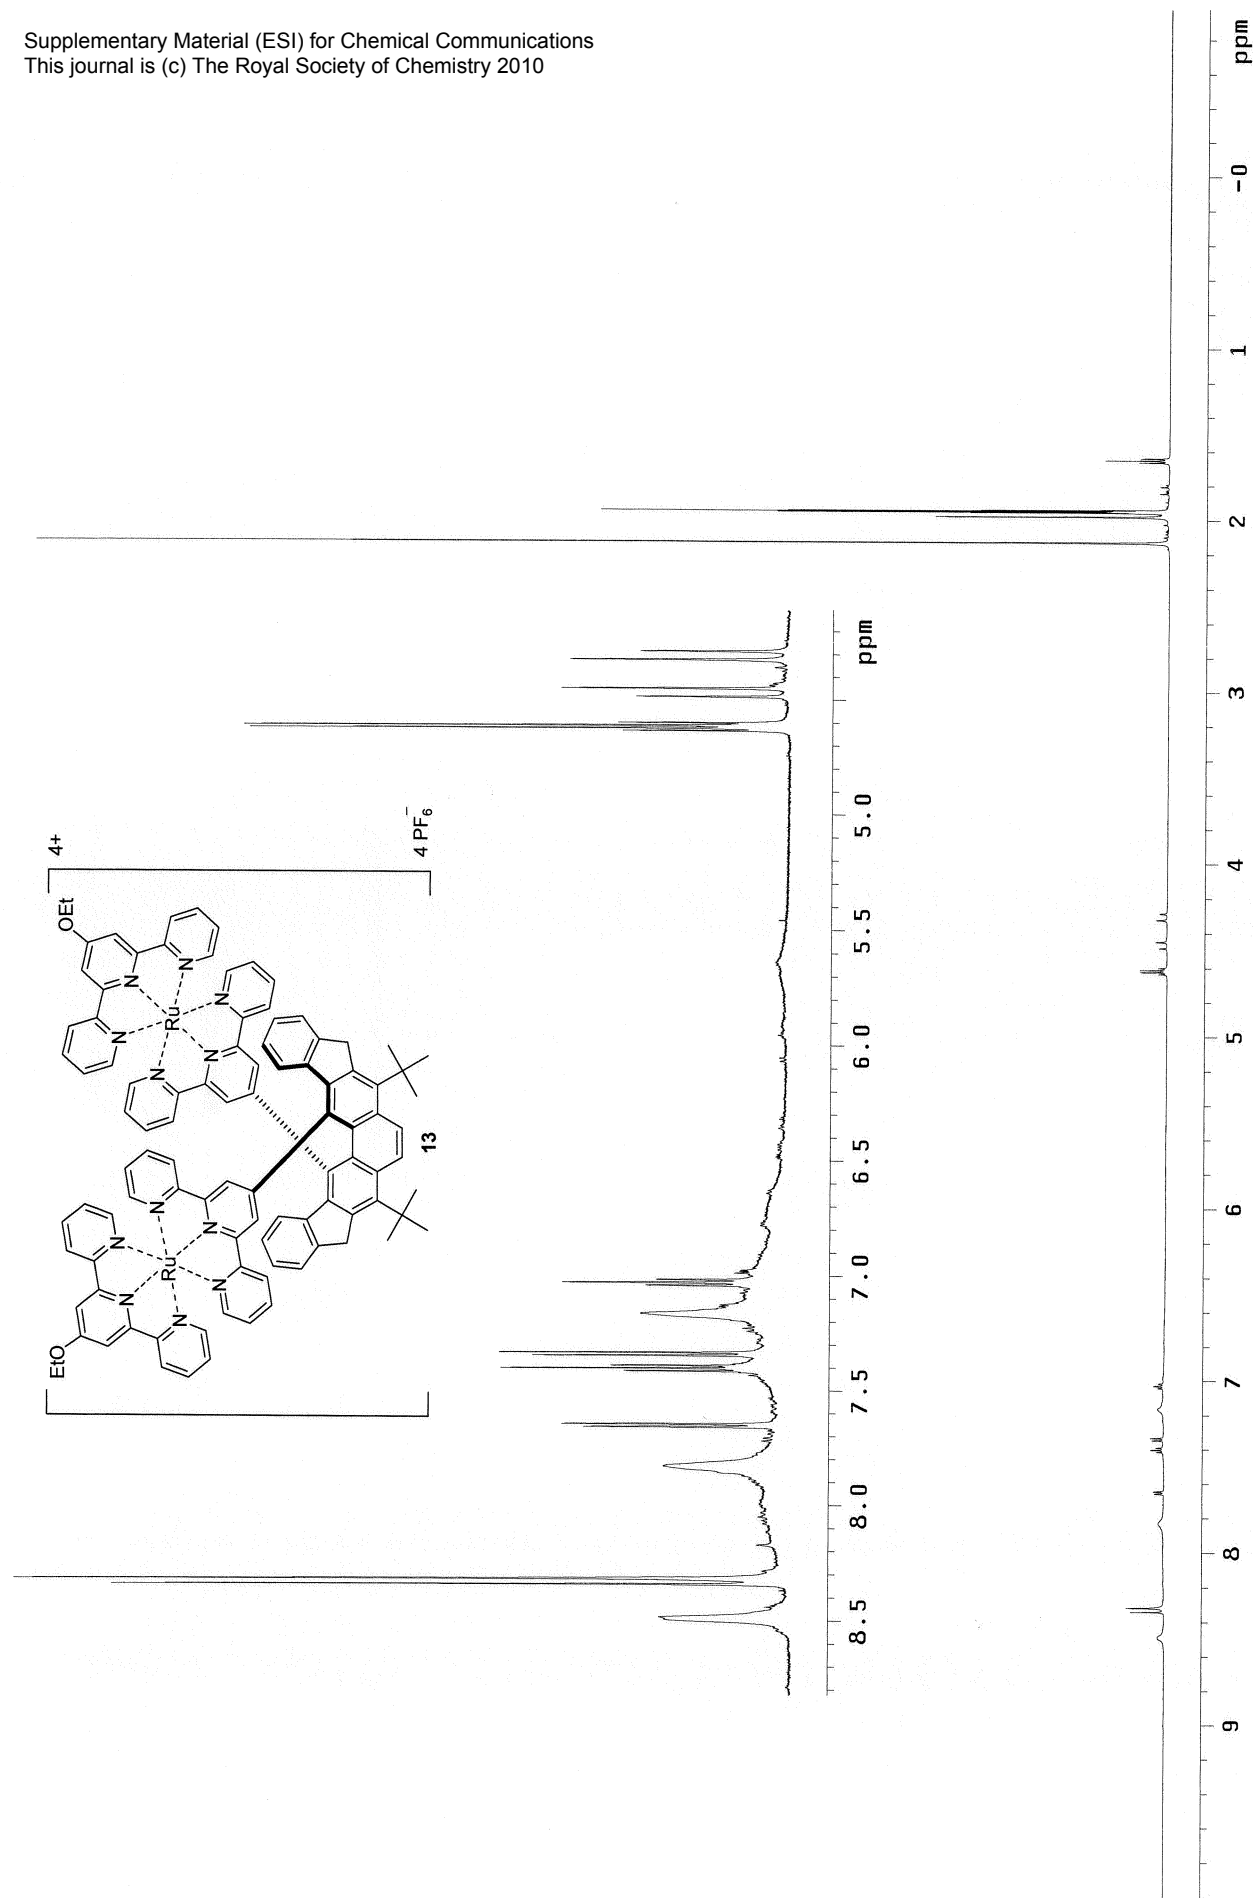



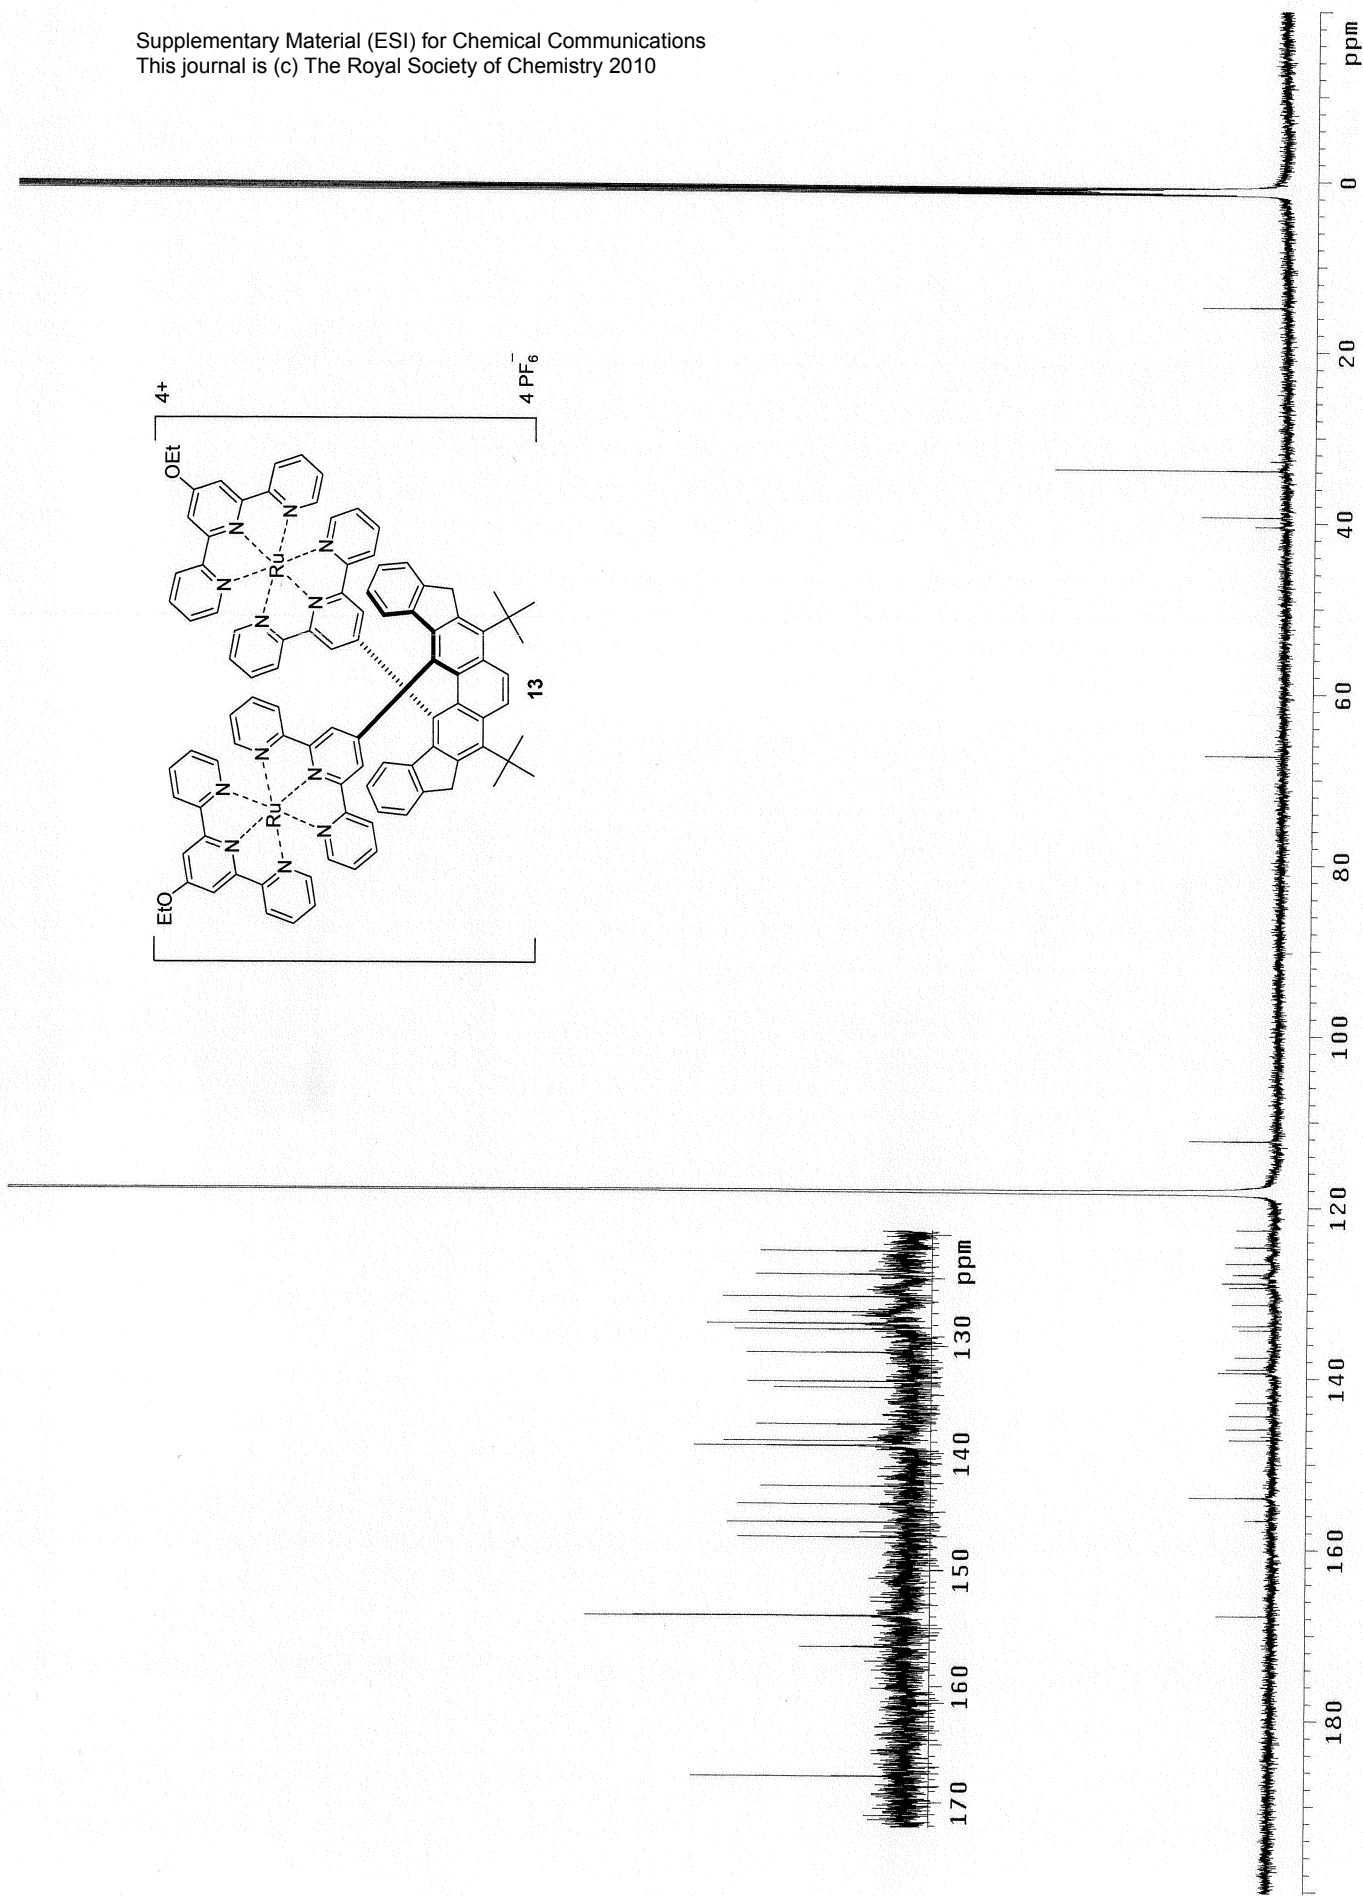

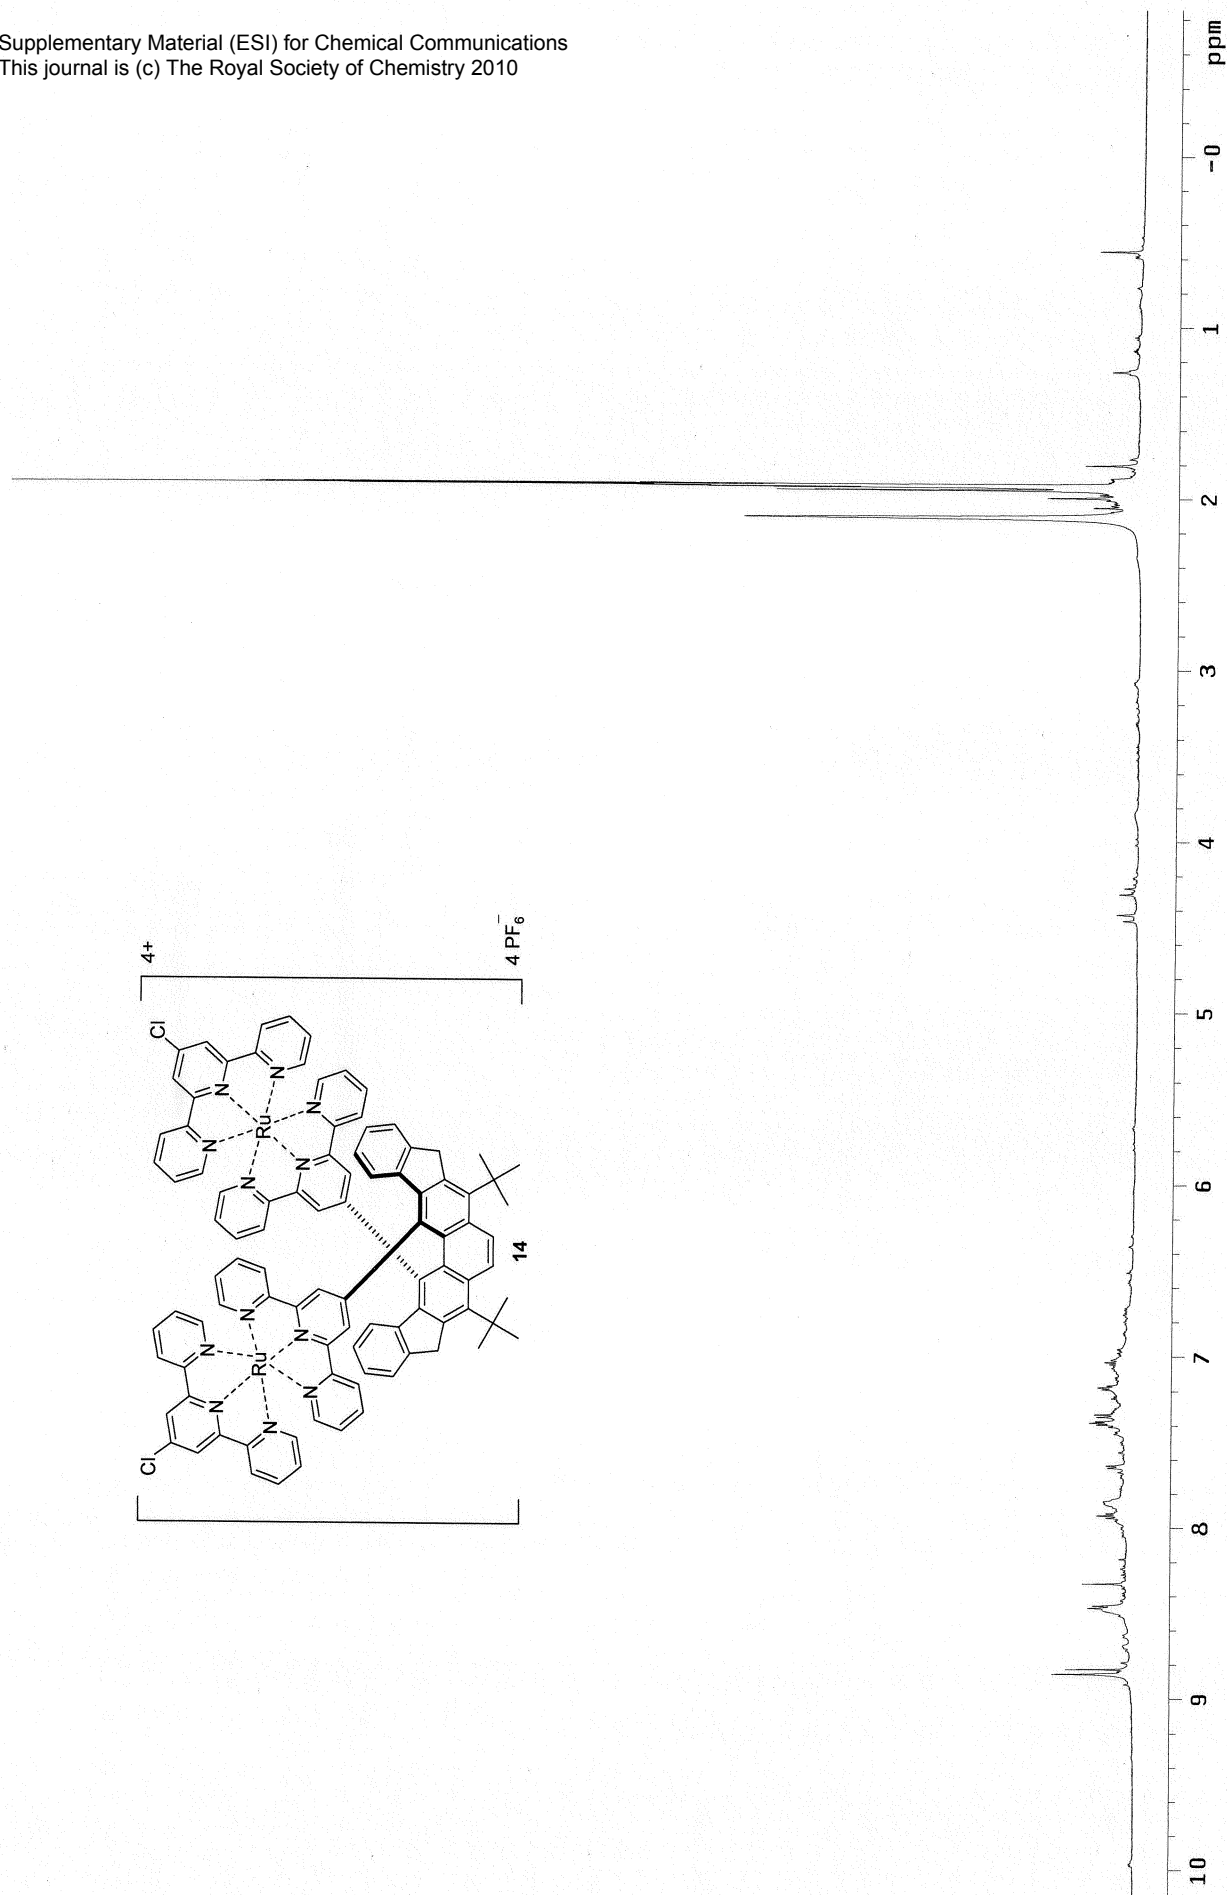

CCDC 750093

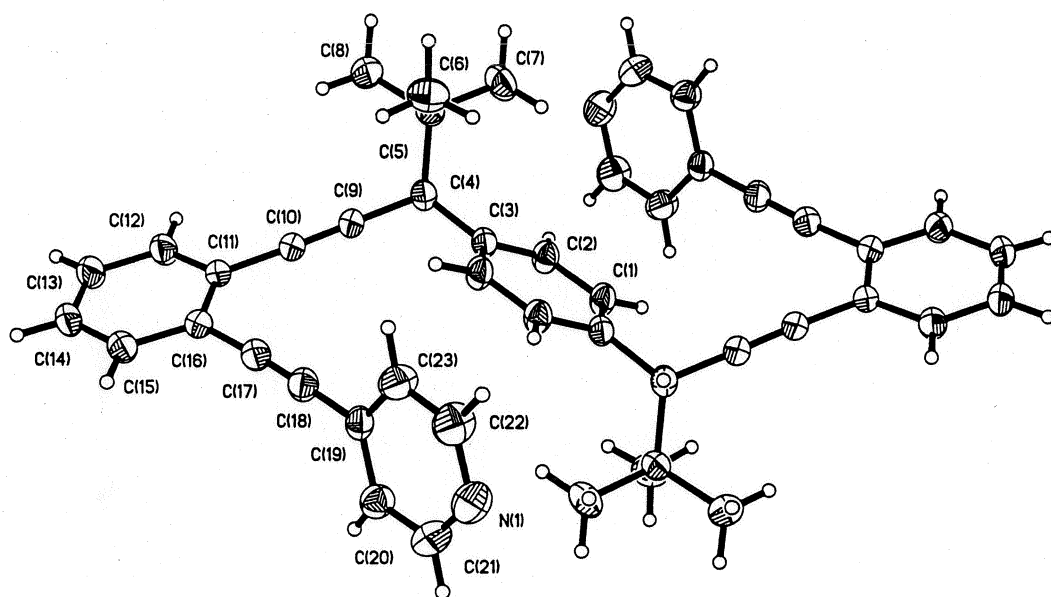

Figure S1. ORTEP Drawing of the Crystal Structure of *meso*-8a. The structure is constrained by a crystallographic center of symmetry in the crystal lattice. The thermal ellipsoids are scaled to enclose 30% probability.

CCDC 750094

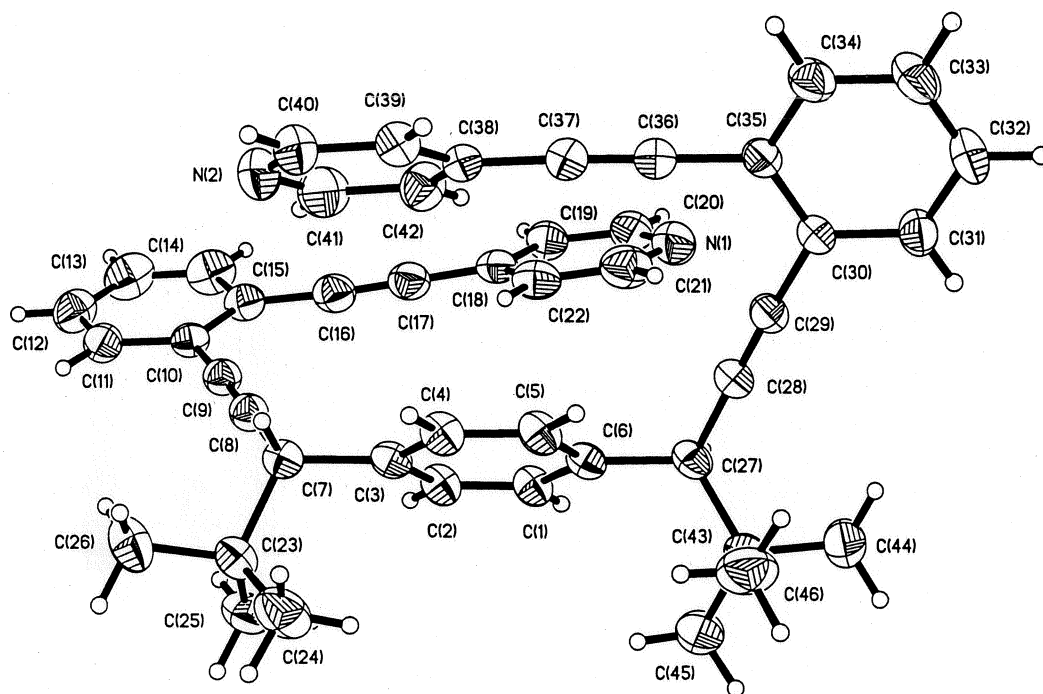

Figure S2. ORTEP Drawing of the Crystal Structure of *rac*-8a. The thermal ellipsoids are scaled to enclose 30% probability.

CCDC 750096

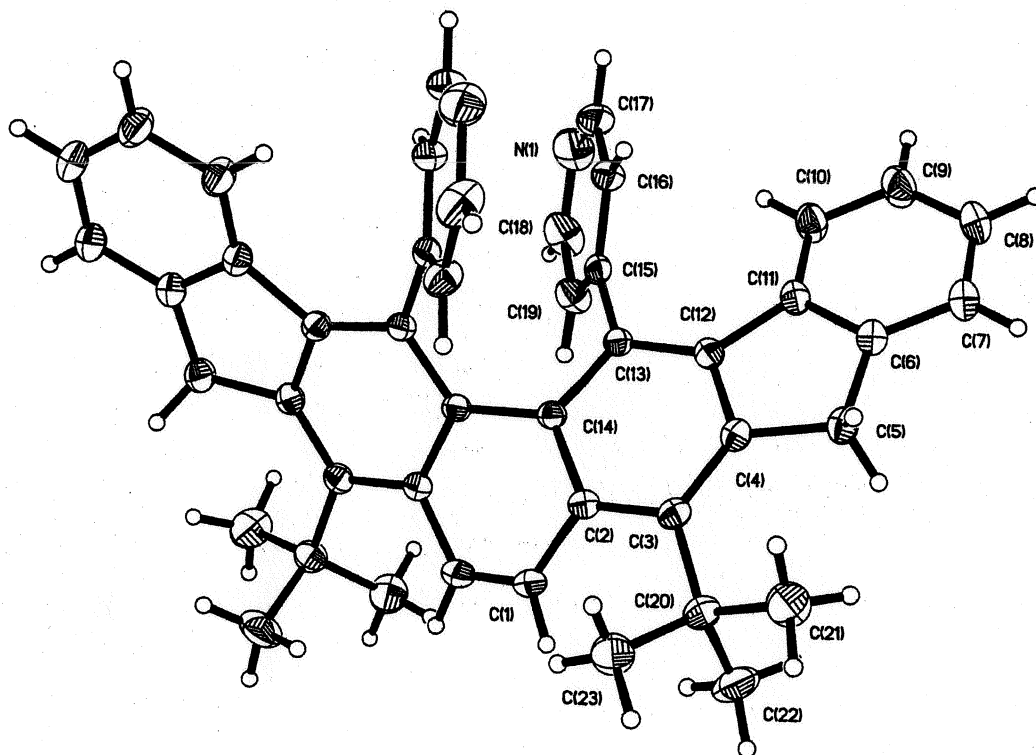

Figure S3. ORTEP Drawing of the Crystal Structure of **2a**. The thermal ellipsoids are scaled to enclose 30% probability.

CCDC 750095

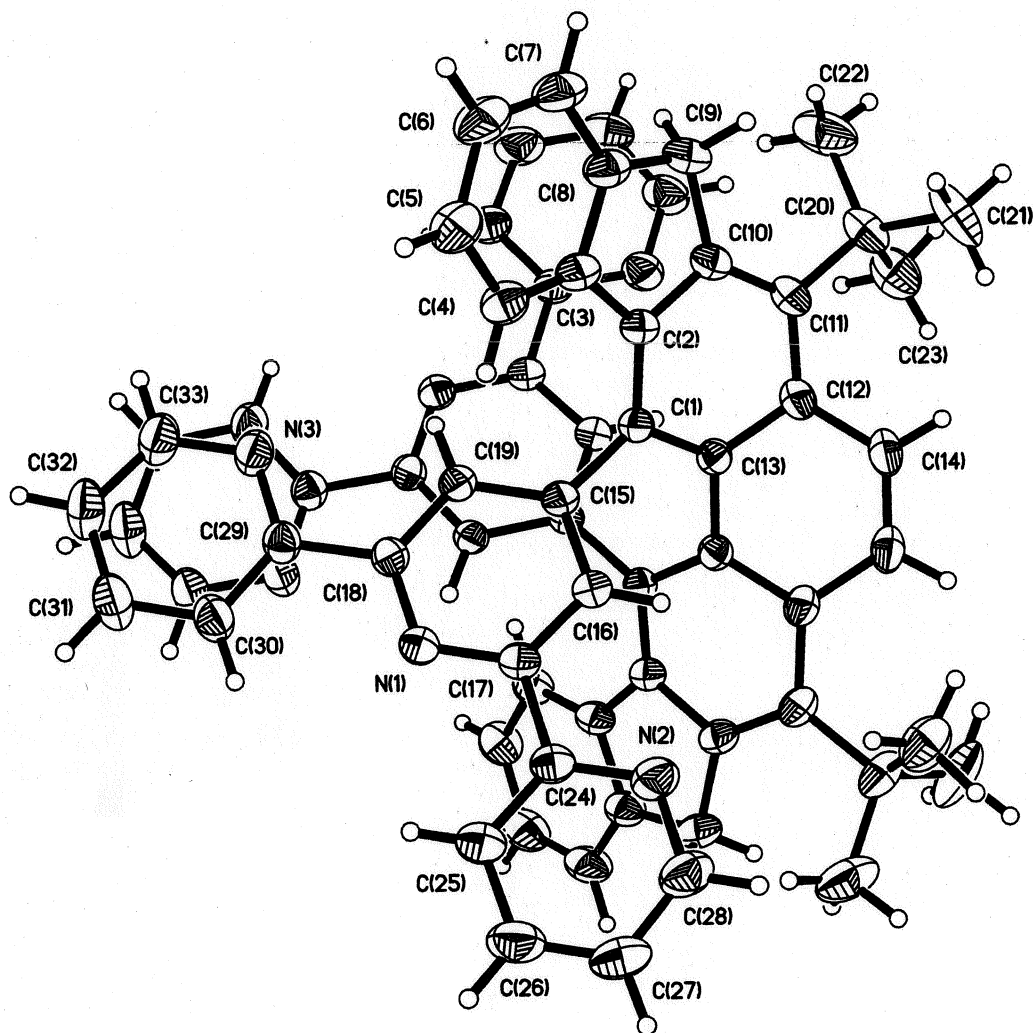

Figure S4. ORTEP Drawing of the Crystal Structure of **2c**. The structure is constrained by a crystallographic two-fold rotation axis. The thermal ellipsoids are scaled to enclose 30% probability.

(a)

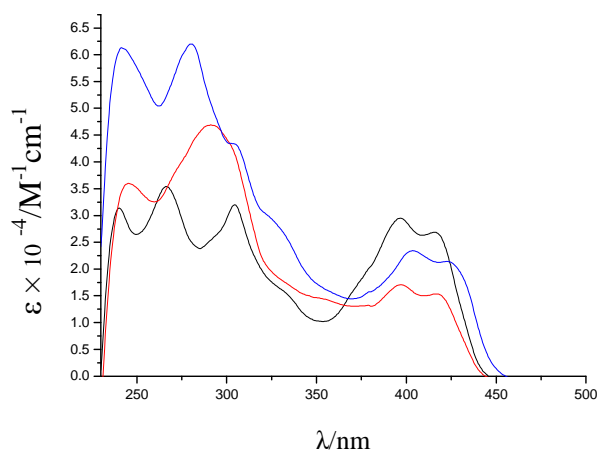

(b)

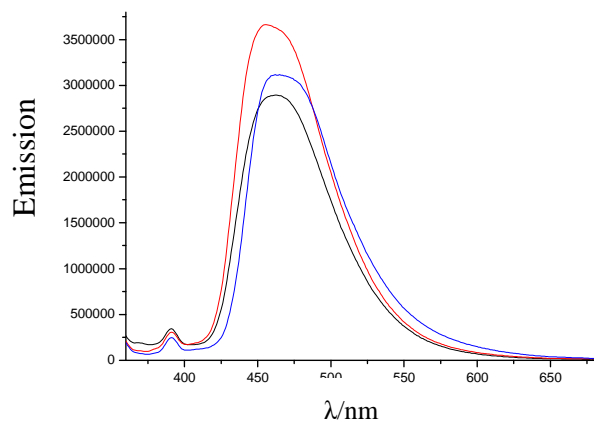

Figure S5. (a) UV-vis absorption spectra and (b) luminescence spectra of **2a** (black), **2b** (red), and **2c** (blue) in dichloromethane at room temperature.
